# Supplementary material for: Dr. Smartphone, can you support my trauma? An informatics analysis study of App Store apps for trauma- and stressor-related disorders
Source: PeerJ. 2023 May 9;11:e15366. doi: 10.7717/peerj.15366 (PMC10178213; doi:10.7717/peerj.15366)
Supplement: Supplemental Information 1 — The search strategy, apps extracted, duplicates removed and app characteristics. [file peerj-11-15366-s001.xlsx]

## Sheet: Provision of tools
			Provision of technique & Tools	N	(%)
			Psychoeducation	58	0.716049
			Self-reflection / Journaling	24	0.296296
			Clinical Assessment	12	0.148148
			Symptom Management / Progress Tracking	37	0.45679
			Courses / Trainings / Guided Sessions / Activities	56	0.691358
			Tips / Advice / Resources	30	0.37037
			Links to services / Access to Clinicians / Referrals	21	0.259259
			Option for in-app Customisation	18	0.222222
			Others	31	0.382716
			(E.g. Ad-free, requires an account, access to events, subscription-based, reminders, option to 'share' results delivered to clinicians, links to social media, in-app link to EAP, face-recognition)

## Sheet: Sub-categories
						Therapeutic Background - Subcategories	N	(%)
						Specifically developed for trauma- and stressor related symptomatology/disorders	48	0.592593
						Contains a section specified for trauma-informed care	43	0.530864
						Adverse Childhood Experiences (ACE's) Questionnaire	1	0.0123457
						Acceptance & Commitment Therapy (ACT)	2	0.0246914
						Cognitive Behavioral Therapy (CBT)	8	0.0987654
						Cognitive Behavioral Therapy for Insomnia (CBT-i)	1	0.0123457
						Cognitive Processing Therapy (CPT)	2	0.0246914
						Dialectic Behavioral Therapy (DBT)	1	0.0123457
						Emotional Freedom Therapy - Tapping (EFT-T)	3	0.037037
						Eye Movement Desensitization and Reprocessing (EMDR)	7	0.0864198
						Post-Traumatic Stress Disorder (PTSD) informed strategies & Interventions	9	0.111111
						Exposure Therapy (and Prolonged Exposure therapy - PE)	2	0.0246914
						Psychological First-Aid (PFA)	1	0.0123457
						Trauma-informed care	2	0.0246914
						Trauma-informed neurobiology/neuroscience	2	0.0246914
						PCL Test	2	0.0246914
						Contains a section useful to support trauma-related symptoms according to app description	38	0.469136
						Art Therapy	2	0.0246914
						Journal & Mood Tracking	15	0.185185
						Meditation	1	0.0123457
						Mindfulness	2	0.0246914
						Narrative Therapy	1	0.0123457
						Online Community	6	0.0740741
						Organisation-based frameworks (TRiM Military, TRiM Police, Community Wellness model & STAIR)	4	0.0493827
						Positive Psychology	4	0.0493827
						Sensory & Image Identification	1	0.0123457
						Tension & Trauma release technique	1	0.0123457
						Yoga Therapy (Trauma-healing)	1	0.0123457
						Not specified therapeutic background and/or model	32	0.395062

## Sheet: G. Characteristics
		General Characteristics	N	(%)
		Age Groups
		17+	15	0.185185
		12+	31	0.382716
		9+	1	0.0123457
		4+	35	0.432099
		Category
		Casual	1	0.0123457
		Education	4	0.0493827
		Health & Fitness	57	0.703704
		Lifestyle	6	0.0740741
		Medical	15	0.185185
		Social Networking	1	0.0123457
		Target Market
		Adolescents, Children, Parents & Caregivers	9	0.111111
		Clinicians and clients	9	0.111111
		Couples & Partners	1	0.0123457
		First reponders, medical care personnel, police, and public safety professionals	8	0.0987654
		Support Community	6	0.0740741
		Veterans, military combat personnel, or soldiers (including families of)	7	0.0864198
		Sexually Abused	1	0.0123457
		Mothers	1	0.0123457
		Availability and Payment
		Free	72	0.888889
		Paid (AUD)	11	0.135802
		1.49	1	0.0123457
		4.49	1	0.0123457
		7.99	5	0.0617284
		10.99	1	0.0123457
		14.99	1	0.0123457
		9.99	2	0.0246914
		User Ratings
		N/A	49	0.604938
		Apps with a minimum of 3 user ratings	24	0.296296
		5*	6	0.0740741
		4* (4-4.9*)	16	0.197531
		3*	3	0.037037

## Sheet: Categories
App Name	Sub-heading descriptor	Rating	No. of ratings	App availability		Description	Sub-descriptors		Therapeutic Background				Content (Type of Technique)
				Free	Paid (AUD)		Age	Category	CBT	EMDR	Other	Not specified	Psychoeducation	Self-reflection / Journaling	Clinical Assessment / Self-tests	Symptom Management / Progress Tracking	Courses / Training / Guided sessions / Activities	Tips / Advice / Resources	Links to services /Access to Clinicians / Referals	Option for in app customisation / Personalisation	Other
5 Minute Journal: Self-care	Daily Gratitude & Mood Tracker	5*	1.2k	Y		Provides information based on latest practice guidelines and theoretical developments for 600+ medical and some mental health conditions	4+	Health & Fitness			Positive Psychology			Y						Y
ACE's	Adverse Childroom Experiences	Nil	N/A		7.99	Adverse childhood experiences questionnaire and resources.	12+	Medical			ACE's Questionnaire		Y					Y
ACT Coach	Acceptance and commitment	3*	2	Y		For veterans, service members, and others who are in Acceptance and Commitment Therapy in consultation with a therapist.	12+	Health & Fitness			Acceptance and Commitment Therapy (ACT)		Y			Y	Y	Y
AfterTrauma	Traumatic Injury Recovery Help	Nil	N/A	Y		Co-designed with survivors, carers, doctors, and therapists. App is advised for users seeking to rebuild their lives after serious injury and emotional impact.	12+	Health & Fitness				Y	Y			Y				Y	Chat feature to connect with other survivors and carers.
Anxiety Release based on EMDR	Health & Fitness	4.3*	30		7.99	Based on BLS which includes brain training, anxiety management sessions, pure bilateral stimulation and safe place exercise. Recommended for clinicians and clients.	4+	Health & Fitness		Y						Y	Y
APN Connection	Virtual Therapy + Peer Support	Nil	N/A	Y		Platform to connect users in recovery from addiction, mental health and trauma.	17+	Health & Fitness				Y	Y					Y	Y		Connects users to therapy groups, therapists and support community. App functions allow users to schedule, manage and join virtual sessions.
Awaken Me - Emotions	Deal with your trauma.	Nil	N/A	Y		Self-reflection app that prompts questions related to trauma, fears and triggers.	9+	Health & Fitness				Y	Y	Y
Bloom: CBT Therapy & Self-care	Daily Mental Health Coach	4.8	1.1k	Y		Provides daily mental health videos based on the results of your personalised algorithm when users begin.	4+	Health & Fitness	Y				Y	Y			Y			Y
Bloom Coaching	Healing from betrayal trauma	Nil	N/A	Y		The Bloom coaching app accompanies users' gain education and understand their need to heal through simple and easy-to-follow assignments. App includes guided curriculum of videos and assignments which addresses: understanding your story, how trauma works, self care, udnerstanding addiction, trust, disclosure, boundaries and forgiveness.	17+	Education				Y	Y				Y				Guided curriculum with self-assignments
Bounce Back Now	Health & Fitness	Nil	N/A	Y		Developed to support users' emotional recovery affected by traumatic events.	12+	Health & Fitness				Y	Y	Y		Y	Y
Bright Path	Education	Nil	N/A	Y		This app is a research mobile tool designed to offer additional support to teens and adolescents in therapy for mental health and substance disorders.	12+	Health & Fitness				Y	Y			Y		Y
BSDR Player	Health & Fitness	5*	1		7.99	App generates bilateral sounds desensitization (EMDR technqiue) to help users process past emotional experiences. Developed to aid the treatment of trauma symptoms.	12+	Health & Fitness		Y							Y
Calm and Confident	Relax and reconnect	5*	10		7.99	Comprises 10 guided meditations based on trauma therapy principles. EMDR.	4+	Health & Fitness		Y	Trauma principles, based on neuroscience						Y
CBT Thought Diary	Mood Tracker & Therapy Journal	5*	636	Y		Desgigned to help users self-reflect with daily prompts and trakc their mood and negative thoughts.	12+	Medical	Y		Acceptance Commitment Therapy (ACT), Dialectic Behavioral Therapy (DBT), Positive Psychology		Y	Y		Y
Couple HOPES	Lifestyle	Nil	N/A	Y		Uses an online PTSD intervention to help couples improve their PTSD symptoms and relationship with the support of a coach.	12+	Lifestyle			PTSD-informed interventions for couples		Y				Y		Y
CPT Coach	Cognitive Processing Therapy	Nil	N/A	Y		App is prescribed to clients who are participating in Cognitive Processing Therapy (for PTSD) with a mental health professional. The app provides supplemental materials to support individuals in therapy.	12+	Health & Fitness			Cognitive Provessing Therapy (CPT)		Y			Y	Y		Y
Dialogue Network	Moral injury social network	Nil	N/A	Y		Online network around the subject of moral injury for women veterans and families.	12+	Social Networking										Y			Post featured content, set up groups, host events, sponsor feeds
EMDR	Look. Listen. Feel	Nil	N/A	Y		App provides EMDR therapy through personal customisation with speed settings, stereo sound types, and visuals.	4+	Medical		Y							Y			Y
EMDR 101	follow the dot…	4.7*	3		7.99	Designed for seasoned practitioners and users to customise EMDR sessions	12+	Medical		Y			Y				Y			Y
F.I.R.S.T Support	Stress & trauma Response	Nil	N/A	Y		App is described as 100% research-based, customised-to-users, with 24/7 access. Resources included to help users cope, build resilience and regulate mental health.	17+	Health & Fitness				Y	Y			Y	Y			Y
Finch: Self Care Widget Pet	Daily Journal & Habit Tracker	4.9*	1.5k	Y		Daily self-care app where users care for a 'pet' as their self care ritual. Intended to increase resilience, productivity and gratitude.	4+	Health & Fitness				Y	Y	Y		Y	Y			Y
First - First Responder Health	Protect Against Trauma	Nil	N/A	Y		Designed for first responders including police officers, firefighters, medical professionals, EMS workers, search and rescue specialists and military personnel. App includes tracking missions and calls they've responded to, evaluate stress and how to protect themselves from stress in their line of duty.	4+	Health & Fitness				Y	Y		Y	Y	Y
GO EFT TAPPING - Reduce Stress	Instant stress reduction	4.8*	12	Y		Desgined to help users reduce stress, worry, anger, frustration, fear, and sadness through guided tapping instructions.	4+	Health & Fitness			Emotional Focused Therapy Tapping (EFT-T)		Y			Y	Y
iChill	Guided wellness skills	5*	1	Y		Developed by the Trauma Resource Institute Inc. to guide children, teens and adults utilising the community wellness model.	4+	Health & Fitness			Community Wellness Model		Y					Y
Insomnia Coach	Help improve your sleep.	Nil	N/A	Y		Developed by US Department of Veterans Affairs (VA) and designed for veterans, military service members, and others suffering from insomnia.	12+	Health & Fitness	Y		Cognitive Behavioral Therapy for Insomnia (CBT-i)		Y	Y		Y	Y	Y			Personalised feedback from 'Sleep' coaches.
KidTrauma	Medical	Nil	N/A	Y		An application for parents/carers to support their child in the early aftermath of a traumatic event.	4+	Medical				Y	Y		Y		Y	Y	Y
Loving The Self Affirmations	Self Love and Heal Trauma	4.8*	4	Y		Daily messages and a series of themes for users dealing with behavioral issues which include wallpapers and notifications.	4+	Health & Fitness				Y	Y
Meomind - Free Therapy	Personalised, recorded therapy	Nil	N/A	Y		Therapy library of recorded sessions by experienced therapists for users to listen to. Recorded therapy sessions covers a range of issues such as anxiety, depression, stress, sleep and trauma.	4+	Health & Fitness					Y				Y				Access to app-community
MiLTRiM	Health & Fitness	Nil	N/A	Y		Trauma Risk Management - Military Edition is a peer delivered psychological support system designed to allow organisations to proactively support personnel in the wake of traumatic events.	12+	Health & Fitness			TRiM trauma risk and Stress management (Military version)		Y					Y
MindFit.ai	Fit your mind, value yourself	Nil	N/A	Y		MindFit is mobile fitness based on CBT for fixing your perception to improve positive mindset, assertiveness and goal setting.	12+	Health & Fitness	Y						Y		Y				Self-assessments with the app's artificial intelligence to understand yourself better.
Mira Trauma and PTSD Support	Symptom Management and Support	2*	1	Y		Self-help app to manage trauma symptoms and PTSD. Includes Exercises, trigger, symptom tracking, analytics to record user progress, emergency hotlines, resources and more.	12+	Health & Fitness				Y	Y	Y		Y	Y	Y			Free 14 day trial. Renewal starts from $7.99 for the first month and increases to $12.99.
Mission Reconnect	For Veterans and Partners	Nil	N/A	Y		Designed to support Veterans and their partners with mind and body programs that support physical, mental and relationship health to reduce PTSD, anxiety, depression, stress, increase resilience and self-compassion. Users can only utilise the app after creating an account from the website.	17+	Health & Fitness					Y				Y	Y
MOODA	Time to face myself	4.8*	34		1.49	A mood tracking app to improve emotional wellbeing. One option includes shaking your phone to track your dominant feelings.	4+	Lifestyle				Y		Y		Y					Option to share your feelings with contacts
Mooditude: Self-care App	Track & improve your mood	5*	5	Y		Mooditude is utilised by clinicians and users to monitor your mood and mental health. The app has three stages. Step 1: Take a mental health test. Step 2: Personliased self-care plan. Step 3: MH tracking and monitoring.	4+	Medical				Y	Y		Y	Y	Y	Y	Y	Y	Access to app-community
Moodnotes - Mood Tracker	Self-care & CBT Journal	4.5*	616	Y		Mood Tracker and journaling app to improve thinking habits.	12+	Health & Fitness	Y		Positive Psychology		Y	Y		Y	Y	Y			Uses imaging recognition to scan facial emotions
Mood Balance - Mental Health	Self-care & relaxing games	4.3*	1.2k	Y		Designed to help you query your feelings, their causes and the resultant negative moods experienced. First, users select an emotion, define it and document the time and date. Then, users can explore games to challenge and soothe their emotions.	4+	Health & Fitness				Y	Y	Y		Y	Y			Y	Free 3-day trial. Monthly $9.99; Yearly $59.99
MyREBOOT	REBOOT Recovery	Nil	N/A	Y		Online community for people impacted by trauma and mental health challenges. Access to online courses related to trauma healing, lifeguides, podcasts and blogs.	4+	Lifestyle				Y	Y				Y				Includes podcasts and blogs
Overcome pain based on EMDR	Based on EMDR	3.9*	7		9.99	Comprises of 3 playlists for controlling pain and associated stress that maintain pain. Playlist are designed with different goals across mental health strategies, sensory healing and stress management.	4+	Health & Fitness		Y			Y				Y
P247	Psychcare App	Nil	N/A	Y		Psychcare 24/7 is an online counselling service. Users must first register an account on the main website. Developed by the Trauma Centre of Australia	4+	Health & Fitness				Y							Y
Paramedic Trauma Review	Medical	Nil	N/A		9.99	Designed for paramedics to be an in-class review during trauma modules or focused practice before examinations. Includes content on physical and mental health trauma delivery.	17+	Medical				Y	Y				Y
PE Coach 2	Health & Fitness	Nil	N/A	Y		PE coach is to be used during therapy for Post-traumatic stress disorder. The app guides you through exercises assigned by your therapist. Created by the US Departent of Veterans Affairs (VA)	12+	Health & Fitness			Prolonged Exposure Therapy (PE)					Y	Y
PFA Mobile	Health & Fitness	Nil	N/A	Y		PFA assist responders who provide psychological first aid to adults, families and children as part of an organisational effort. Developed by the US Department of Veterans Affairs in partnership with the National Child Traumatic Stress Network (NCTSN) and DoD's National Center for Teleheath &. Technology.	4+	Health & Fitness			Psychological First Aid frameworks (PFA)						Y	Y	Y
PolTRiM	Health & Fitness	Nil	N/A	Y		Police Trauma and Resillience Management is a police specific TRiM programme. It provides knowledge of the TRiM Risk Factors and a structured methodology for TRiM implementation.	12+	Health & Fitness			TRiM trauma risk and Stress management (Police version)		Y				Y	Y			Provides information on future courses including documentation, maps and location details. Allows users to print, share and email necessary documents for your role as a PolTRiM Practitioner.
PTSD Coach	Health & Fitness	4.4*	21	Y		Designed for users with diagnosed or may have PTSD. The app includes psychoeducation, helfup resources, a self-assessment for PTSD, and tools to help users manage their symptoms. Developed by the US Department of Veterans Affairs.	12+	Health & Fitness			PTSD-informed strategies		Y		Y		Y	Y	Y	Y
PTSD Coach Australia	Health & Fitness	3.7*	6	Y		Designed to help users understand and manage PTSD symptoms and disorder. This is the Australian version based on the latest scientific understandings of PTSD and modified from the US Department of Veterans Affairs PTSD Coach app.	12+	Health & Fitness			PTSD-informed strategies		Y		Y	Y	Y	Y	Y	Y	Includes a scheduler to allo users to plot the results and email them to health professionals.
PTSD Family Coach	Health & Fitness	Nil	N/A	Y		PTSD Family Coach is designed for family members of those living with Post-traumatic Stress Disorder. This app conists of 24 unique tools to help users manage stress, exercises and tools to rebuild social networks. Information revolves around content on how to practice self-care, taking care of your relationships and loved ones.	12+	Health & Fitness			PTSD-informed strategies		Y			Y	Y	Y			Progress tracking includes goals plotted on a timeline. In-built with links to social media where users can join community discussions (E.g. by linking their Twitter account).
PTSD Free	3 Keys to Live PTSD Free	Nil	N/A	Y		Certified by The American Institute of Stress, PTSD Free is created for veterans, soldiers, and anyone suffering from PTSD through a 3-tiered solution. Key features include 1. Stopper Tab - one-touch instant relief to manage random stress reactions, 2. MyMeds Tab - structures and maintains medication practice, and 3. Resolve Tab - a revolutionary tool to process traumatic memories that fuel PTSD …	4+	Health & Fitness			PTSD-informed strategies		Y			Y	Y	Y	Y		Membership includes 24/7 access to online relaxation tools on PC and Mobile. Users can link their social profiles to the app and access the app's community.
PTSD Test	Post-traumatic Stress Disorder	4.8*	20	Y		Designed to evaluate your symptoms of PTSD with a scientifically-supported 20-question screening test (PCL-5, based on the PTSD-checklist for DSM-5).	12+	Medical			PCL-5 Test		Y		Y	Y		Y			Includes reminders for users to re-take the assessment and track progress.
PTSD Test (PCL)	Post-traumatic Stress Disorder	Nil	N/A	Y		This app is a self-evaluation test for Post-Traumatic Disorder based on 17-questions for diagnosing, monitoring and measuring the severity of PTSD.	12+	Health & Fitness			PCL Test				Y	Y		Y	Y		Upon completion of test, results will be displayed with an option for users to "find help" or "remind me weekly".
PTSD Toolkit for Nurses	Health & Fitness	Nil	N/A	Y		This app is a tool-kit designed for nurses to treat veterans with PTSD. It provides clinical information and interactive simulations. Developed by the American Nurses Foundation (ANF) and Penn Nursing Science in partnership with Lippincott Solutions team.	17+	Health & Fitness			PTSD-informed for Veterans		Y		Y		Y	Y	Y		Nurses are able to 'test their knowledge' through interactive simulations. Materials include recent case studies.
R U Suicidal?	Health & Fitness	3*	2	Y		R U Suicidal? Helps users who may be or is suicidal through recorded videos of psychologist guiding you through phases to stabilise safety.	4+	Health & Fitness				Y	Y			Y	Y		Y		Users can store confidential information in the app that can be used with a clinician.
RailRes	Health & Fitness	5*	4	Y		RailRes has been developed by the TrackSAFE Foundation for the Australian rail industry. It aims to assis rail employees to manage their immediate responses to stress and help build resilience.	12+	Health & Fitness				&	Y		Y	Y	Y	Y	Y		Users can access Employee Assistance Program (EAP) directly from the app.
Reflectly - Journal & AI Diary	Mood Tracker & Daily Quotes	4.3*	6k	Y		Reflectly is a journaling app and mood tracker accompanied by an AI to prompt your reflections.	4+	Health & Fitness	Y		Positive Psychology & Mindfullness			Y		Y				Y	App provides daily motivational quotes and reminders personalised to users based on the in-built algorithm.
Rethinker	Cognitive self-therapy	Nil	N/A	Y		Rethinker helps users cope with stressful or triggering situations. Users describe a situation and are given examples situations to explore their thoughts in that situation. These self-activities enable users to compare their evaluation of the event with what is reasonable, positive and negative thought process followed by self-evaluation.	4+	Medical	Y					Y		Y
S.T.A.R. Support	Stress, Trauma and Resiliency	Nil	N/A	Y		App that provides tailored mental health resources for individuals and organisations. The app supports teams of responders, medical professionals, addiction care specialists and individuals to decrease burnout, turnover and increase team well-being and productivity. Backed by research completed at Ohio State University, USA.	17+	Health & Fitness				Y	Y		Y	Y	Y	Y	Y
Self Help for Trauma	Self Tapping Step-by-step	3.7*	3	Y		Available in 33 languages, this app displays visuals to enable users to manage trauma symptoms through the application of Trauma Tapping Technique (TTT). TTT is an efficient and scalable non-verbal First Aid.	12+	Medical			Trauma Tapping Technique (TTT)		Y				Y
Self-Love	Self-care by CPT & Art Therapy	Nil	N/A	Y		This app is built on the content of self-parenting, a concept that has helped trauma survivors to establish healthy coping skills. The app asks users questions about flashbacks, triggers, and stresses in order to facilitate re-connection with their feelings, body and inner child. A combination of cognitive processing therapy and art therapy are applied in the exercises.	4+	Health & Fitness			Cognitive Processing Therapy (CPT) & Art Therapy		Y	Y			Y
Shadow's Edge	Art, Journaling, Shadow fights	Nil	N/A	Y		Shadow's Edge is the only mental health game (at time of data collection) where users defeat their personalised shadows in epic battles. Writing prompts are based on Narrative Therapy and Positive Psychology. Developed by The Digging Deep Project, an award-winning non-profit with a mission to create mental health tools that are based on expression, psychology and gaming.	12+	Casual			Narrative Therapy, Art Therapy & Positive Psychology			Y			Y			Y	Ad-free game with no in-app purchases.
Sleep Restore	Based on EMDR	4.4*	22	Y		Guided meditations + bilateral stimulation (BLS - based on EMDR). Audio sessions for getting to sleep and getting back to sleep; overcoming worry, tension and insomnia. Customisation of sessions available.	4+	Health & Fitness		Y			Y		Y		Y
Solfeggio Root Chakra 396Hz	Cleanse Guilt, Fear & Trauma	Nil	N/A	Y		This app plays low and smooth frequency that helps cleanse feelings of guilt, fear, and trauma associated with Muladhara (root) Chakra.	4+	Health & Fitness			Meditation						Y			Y
STAIR Coach	Help manage your emotions	Nil	N/A	Y		Self-help course based on Skills Training in Affective & Interpersonal Regulation (STAIR).	12+	Health & Fitness			Skills Training in Affective & Interpersonal Regulation (STAIR)		Y	Y		Y	Y		Y	Y
Stoic	How are you feeling?	4.8*	1.4k	Y		Everyday Stoic prepares bite-sized mental health exercises and fragments from books to help users deal with obstacles they face. It is a mental health tracker companion for mood tracking, journaling, meditations and reflection. The algorithm analyses users emotive influences and provides insights.	4+	Health & Fitness				Y		Y		Y	Y				Inspirational quotes and reminders are delivered to users.
Stress Less TRE	Medical	1*	1		14.99	Stress Less by TRE stands for tension & trauma Releasing Exercises to release stress/tension from the body accumulated from everyday difficult situations, immediate or prolonged situations or traumatic life eperiences.	12+	Medical			Tension & Trauma Releasing techniques		Y			Y	Y
Support Base	Support your treatment journey	Nil	N/A	Y		Support Base is a smartphone app designed to support frontline workers receiving clinical treatment for PTSD and other mental health conditions. The app includes core elements adapted from an evidenced-based, gold-standard PTSD treatment program by the UNSW Traumatic Stress Clinic. The app features are designed to be used in combination with structured therapy delivered in person or via telehealt…	17+	Health & Fitness			PTSD-informed strategies, Cognitive Restructuring & Explosure Therapy		Y			Y	Y		Y	Y
Tap For Joy	Tap into a stress-free life	Nil	N/A	Y		Tap For Joy is a resource for those who have PTSD. It uses an adaptaion of Eutaptics which rewires the brain and eases the pain from lingering trauma. The app guides you through meditations accompanid by acupressure tapping to reduce stress, anxiety, and increase calmness and happiness.	4+	Health & Fitness			Acupressure Tapping		Y	Y		Y	Y			Y
The Field Guide	because science is right	Nil	N/A	Y		The Field Guide is a psychosocial support and community mental health tool for those affected by stress and trauma with two main objectives: 1. To clarify why and how adverse experiences can affect the brain, body and social behavior, and 2. To provide specific information and exercises to confront the effects of stress, trauma and build resilience.	4+	Education				Y	Y				Y				Communicty based and requires an account.
The Pheonix Project	Let's Rise Together	Nil	N/A	Y		Phoenix is a caring digital community that supports mental health and wellness. The app includes modern tools and a collective care model to support users with their mental health progress.	12+	Health & Fitness				Y	Y					Y			Includes events and experiences that users have options to access.
The Place We Find Ourselves	Lifestyle	4.9*	8	Y		A podcast app that features private practice Adam Young and interview guests as they discuss all matters related to story, trauma, attachment, and interpersonal neurobiology. Each episode unpacks how trauma and abuse impacts the heart and mind, by giving users a glimpse of lived experiences of the guests.	17+	Lifestyle			Trauma informed & neurobiology		Y					Y			Settings include the 'share' function, reminders and contacts.
Think: Mental Health Journal	Diary for anxiety/marriage/ocd	4.5*	2	Y		Think analyzes thoughts to help users undesrtand themselves and improve their lives. It uses artificial intelligence what you write and how you write and provides analysis instantly.	4+	Lifestyle				Y		Y		Y					Ad-free
Trauma Brace	Self help after trauma	Nil	N/A	Y		Brace was developed by a PTSD survivor and is ann app program to help users struggling after experiencing a trauma. Based on techniques that have been proven to reduce symptoms. Examples of traumatic experiences are combat, assault, terrorism, severe accident, loss of a loved one, abuse, life-threatening ilnness, healthcare maltreatment, natural disasters etc. Brace is marketed as a self-care app…	17+	Health & Fitness			PTSD-informed		Y	Y		Y	Y
Trauma Healing Yoga	Trauma Healing Yoga Therapy	Nil	N/A	Y		Designed to help sexually traumatised women to use yoga therapy (and other holistic, science-based techniques) to release and heal trauma.	17+	Health & Fitness			Trauma Healing Yoga Therapy		Y				Y	Y
Trauma Informed Care	Health & Fitness	Nil	N/A	Y		Designed to support caregivers and professionals in responding to trauma's impact on development and focuses. Includes Trauma Informed Care resources from a variety of sources.	17+	Health & Fitness			Trauma-informed Care		Y
Trauma Informed Prevention	TIPS	Nil	N/A	Y		Designed to be incorporated into trauma-focused therapy by clinicians with adolescent clients (13-18). The TIPS app focuses on prevention of risk behaviors that may arise following a traumtic event. App is intended for information, education and research purposes only.	17+	Health & Fitness			Trauma-focused therapy		Y				Y		Y
Trauma Logbook	Manage Intrusive Memories	Nil	N/A	Y		Research App assessing daily intrusive memories in individuals having experiences a traumatic event. Does not work unless you are an active study participant.	4+	Medical						Y					Y
Trauma Recovery	Health & Fitness	Nil	N/A	Y		Trauma Recovery Coach is for anyone who has recently experienced a traumatic event. This app provides training and tools to practice six skills that are helpful for trauma recovery. Developed by the Palo Alto Veterans Institute for Research.	4+	Health & Fitness				Y	Y				Y	Y	Y	Y
TraumaCall	Lifestyle	Nil	N/A	Y		TraumaCall is a subscription based app that puts its members in touch with nearby counsellors. It allows members to select counsellors based on expertise and proximity. The app functionality allows the counsellor to accept or decline member requests, and counsellors can navigate their way to the members based on the location from within the app.	12+	Lifestyle				Y							Y		Subscriptioin based app to connect members to counsellors.
TraumaMAMAs	Tools for Mamas after Trauma	Nil	N/A	Y		App provides tools and resources for mothers who have experienced trauma. Access to trauma-experts that answers questions, monthly toolkits, weekly resources, podcasts, and links to global hotlines/helplines.	4+	Education													App is free to download but requires a subscription fee to access all content.
Trigger Stop	Sensory and Emotional Check-In	Nil	N/A	Y		An app adults can use with and for children to express the sensations in their body with the emotions they are experiencing. The use of the app supports sensory and emotional identification and literacy which enables a child to have the ability to identify, understand and express sensations/feelings in a healthy way. the app allows users to customise a visual person by choosing colors and emotion…	4+	Education			Sensory and Image Identification	Y		Y			Y
VetChange	Help with drinking and stress	Nil	N/A	Y		VetChange is an app designed for veterans, service members and anybody who is concerned about their drinking and how it relates to stress. This app can be useful for developing healthier drinking behaviors, gain insight into the correlation between drinking and moods/situations, use the app's interactive tools to manage stress and drinking, learn about alcohol usage and posttraumatic stress and t…	17+	Health & Fitness				Y	Y	Y		Y	Y	Y
We Love Trauma	A Game to Build connections	Nil	N/A		10.99	This app is a game designed around the body of research showing that vulnerability builds trust and fosters connections and those acts of connections including a safe space for users (that have been formed or caused by trauma) to interact. The goal of this game builds awareness of the ways different stressors and life events impact our mental health including how to communicate comfortably about …	12+	Health & Fitness				Y		Y			Y	Y		Y
Worrydolls	Tiny dolls to remove anxiety	4.8*	1.2k	Y		Worrydolls provides a small doll who is ready to listen to what is worrying users. Worrydolls is used like ajournal to help users overcome anxiety and stress. Developed based on mindfulness, cognitive behavioural therapy and magic.	4+	Health & Fitness			Mindfulness & Cognitive Behavioral Therapy (CBT)			Y		Y

## Sheet: Quality Assessment (2)
App Name	Accessibility			Privacy		Clinical Foundation
	Criteria 1	Criteria 2	Criteria 3	Criteria 4	Criteria 5	Criteria 6	Criteria 7	Criteria 8
	Can the app be accessed offline?	Do users own the data?	Can data be exported?	Does the app have a privacy policy?	Where is the app data stored?	Does the app have relevant content?	Does what it claims?	Does the app specify a condition within trauma and stressor- disorders / commorbidities	Condition specified
ACT Coach	Yes	Yes	Yes	Yes	Device	Yes	Yes	Yes	PTSD
Bloom: CBT Therapy & Self-care	Yes	Yes	Not Specified	Yes	Server	Yes	Yes	Not Specified	Not Specified
CBT Thought Diary	Yes	Not Specified	Yes	Yes	Server	Yes	Yes	Yes	Mood Disorders, Stress & Anxiety
CPT Coach	Yes	Yes	Yes	Yes	Device	Yes	Yes	Yes	PTSD
iChill	Yes	Not Specified	Not Specified	Yes	Server	Yes	Yes	Yes	Stress & Anxiety
Insomnia Coach	Yes	Not Specified	Yes	Yes	Device	Yes	Yes	Yes	Sleep, Stress & Anxiety
Meomind - Free Therapy	Not Specified	Not Specified	Not Specified	Yes	Server	Yes	Yes	Not Specified	Not Specified
Mission Reconnect	Not Specified	Not Specified	Not Specified	Yes	Device	Yes	Yes	Not Specified	Not Specified
Moodnotes - Mood Tracker	Yes	Yes	Yes	Yes	Device	Yes	Yes	Not Specified	Not Specified
Mood Balance - Mental Health	Yes	Yes	Not Specified	Yes	Server	Yes	Yes	Not Specified	Not Specified
PE Coach Not Specified	Yes	Yes	Yes	Yes	Device	Yes	Yes	Yes	PTSD
PFA Mobile	Yes	Yes	Not Specified	Yes	Device	Yes	Yes	Not Specified	Not Specified
PTSD Coach	Yes	Yes	Yes	Yes	Device	Yes	Yes	Yes	PTSD
PTSD Family Coach	Yes	Yes	Yes	Yes	Device	Yes	Yes	Yes	PTSD
Reflectly - Journal & AI Diary	Not Specified	Yes	Yes	Yes	Server	Yes	Yes	Not Specified	Not Specified
Sleep Restore	Not Specified	Not Specified	Not Specified	Yes	Server	Yes	Yes	Yes	Sleep & PTSD
Stress Less TRE	Not Specified	Not Specified	Not Specified	Not Specified	Server	Yes	Yes	Yes	Stress, Anxiety & PTSD
	12x Yes	10x Yes	9x Yes	16x Yes	9x Device			10x Yes		PTSD	5
	0.71	0.59	0.53	0.94	0.53	1	1	0.59		PTSD & Others	2
										Mood, Sleep, Stress & Anxiety	3
	5x N/S	7x NS	8x NS	1x NS	8x Server			7x NS
	0.29	0.41	0.47	0.06	0.47			0.41
	Mean	0.75
	SD	0.24
	Sum	5.99

## Sheet: Quality Assessment
1 is YES, 2 NOT SPECIFIED	Accessibility			Privacy		Clinical Foundation
App Name	Criteria 1	Criteria 2	Criteria 3	Criteria 4	Criteria 5	Criteria 6	Criteria 7	Criteria 8
	Can the app be accessed offline?	Do users own the data?	Can data be exported?	Does the app have a privacy policy?	Where is the app data stored?	Does the app have relevant content?	Does what it claims?	Does the app specify a condition within trauma and stressor- disorders/commorbidities	Condition specified
ACT Coach	1	1	1	1	Device	1	1	1	PTSD
Bloom: CBT Therapy & Self-care	1	1	2	1	Server	1	1	2	Not Specified
CBT Thought Diary	1	2	1	1	Server	1	1	1	Mood Disorders, Stress & Anxiety
CPT Coach	1	1	1	1	Device	1	1	1	PTSD
iChill	1	2	2	1	Server	1	1	1	Stress & Anxiety
Insomnia Coach	1	2	1	1	Device	1	1	1	Sleep, Stress & Anxiety
Meomind - Free Therapy	2	2	2	1	Server	1	1	2	Not Specified
Mission Reconnect	2	2	2	1	Device	1	1	2	Not Specified
Moodnotes - Mood Tracker	1	1	1	1	Device	1	1	2	Not Specified
Mood Balance - Mental Health	1	1	2	1	Server	1	1	2	Not Specified
PE Coach 2	1	1	1	1	Device	1	1	1	PTSD
PFA Mobile	1	1	2	1	Device	1	1	2	Not Specified
PTSD Coach	1	1	1	1	Device	1	1	1	PTSD
PTSD Family Coach	1	1	1	1	Device	1	1	1	PTSD
Reflectly - Journal & AI Diary	2	1	1	1	Server	1	1	2	Not Specified
Sleep Restore	2	2	2	1	Server	1	1	1	Sleep & PTSD
Stress Less TRE	2	2	2	2	Server	1	1	1	Stress, Anxiety & PTSD
Total: 17 Apps

## Sheet: Post Trauma Screening (n 81)
App Name	Sub-heading descriptor	Rating	No. of ratings	App availability		Description	Sub-descriptors		Therapeutic Background				Provision of technique and tools
				Free	Paid (AUD)		Age	Category	CBT	EMDR	Other	Not specified	Psychoeducation	Self-reflection / Journaling	Clinical Assessment / Self-tests	Symptom Management / Progress Tracking	Courses / Training / Guided sessions / Activities	Tips / Advice / Resources	Links to services /Access to Clinicians / Referals	Option for in app customisation / Personalisation	Other
5 Minute Journal: Self-care	Daily Gratitude & Mood Tracker	5*	1.2k	Y		The Five Minute Journal uses proven principles of positive psychology to make you happier in 5 minutes a day with gratitude journaling format.	4+	Health & Fitness			Positive Psychology			Y						Y
ACE's	Adverse Childroom Experiences	Nil	N/A		7.99	Adverse childhood experiences questionnaire and resources.	12+	Medical			ACE's Questionnaire		Y					Y
ACT Coach	Acceptance and commitment	3*	2	Y		For veterans, service members, and others who are in Acceptance and Commitment Therapy in consultation with a therapist.	12+	Health & Fitness			Acceptance and Commitment Therapy (ACT)		Y			Y	Y	Y
AfterTrauma	Traumatic Injury Recovery Help	Nil	N/A	Y		Co-designed with survivors, carers, doctors, and therapists. App is advised for users seeking to rebuild their lives after serious injury and emotional impact.	12+	Health & Fitness				Y	Y			Y				Y	Chat feature to connect with other survivors and carers.
Anxiety Release based on EMDR	Health & Fitness	4.3*	30		7.99	Based on BLS which includes brain training, anxiety management sessions, pure bilateral stimulation and safe place exercise. Recommended for clinicians and clients.	4+	Health & Fitness		Y						Y	Y
APN Connection	Virtual Therapy + Peer Support	Nil	N/A	Y		Platform to connect users in recovery from addiction, mental health and trauma.	17+	Health & Fitness				Y	Y					Y	Y		Connects users to therapy groups, therapists and support community. App functions allow users to schedule, manage and join virtual sessions.
Awaken Me - Emotions	Deal with your trauma.	Nil	N/A	Y		Self-reflection app that prompts questions related to trauma, fears and triggers.	9+	Health & Fitness				Y	Y	Y
Bloom: CBT Therapy & Self-care	Daily Mental Health Coach	4.8	1.1k	Y		Provides daily mental health videos based on the results of your personalised algorithm when users begin.	4+	Health & Fitness	Y				Y	Y			Y			Y
Bloom Coaching	Healing from betrayal trauma	Nil	N/A	Y		The Bloom coaching app accompanies users' gain education and understand their need to heal through simple and easy-to-follow assignments. App includes guided curriculum of videos and assignments which addresses: understanding your story, how trauma works, self care, udnerstanding addiction, trust, disclosure, boundaries and forgiveness.	17+	Education				Y	Y				Y				Guided curriculum with self-assignments
Bounce Back Now	Health & Fitness	Nil	N/A	Y		Developed to support users' emotional recovery affected by traumatic events.	12+	Health & Fitness				Y	Y	Y		Y	Y
Bright Path	Education	Nil	N/A	Y		This app is a research mobile tool designed to offer additional support to teens and adolescents in therapy for mental health and substance disorders.	12+	Health & Fitness				Y	Y			Y		Y
BSDR Player	Health & Fitness	5*	1		7.99	App generates bilateral sounds desensitization (EMDR technqiue) to help users process past emotional experiences. Developed to aid the treatment of trauma symptoms.	12+	Health & Fitness		Y							Y
Calm and Confident	Relax and reconnect	5*	10		7.99	Comprises 10 guided meditations based on trauma therapy principles. EMDR.	4+	Health & Fitness		Y	Trauma principles, based on neuroscience						Y
CBT Thought Diary	Mood Tracker & Therapy Journal	5*	636	Y		Desgigned to help users self-reflect with daily prompts and trakc their mood and negative thoughts.	12+	Medical	Y		Acceptance Commitment Therapy (ACT), Dialectic Behavioral Therapy (DBT), Positive Psychology		Y	Y		Y
Couple HOPES	Lifestyle	Nil	N/A	Y		Uses an online PTSD intervention to help couples improve their PTSD symptoms and relationship with the support of a coach.	12+	Lifestyle			PTSD-informed interventions for couples		Y				Y		Y
CPT Coach	Cognitive Processing Therapy	Nil	N/A	Y		App is prescribed to clients who are participating in Cognitive Processing Therapy (for PTSD) with a mental health professional. The app provides supplemental materials to support individuals in therapy.	12+	Health & Fitness			Cognitive Processing Therapy (CPT)		Y			Y	Y		Y
Dialogue Network	Moral injury social network	Nil	N/A	Y		Online network around the subject of moral injury for women veterans and families.	12+	Social Networking										Y			Post featured content, set up groups, host events, sponsor feeds
EMDR	Look. Listen. Feel	Nil	N/A	Y		App provides EMDR therapy through personal customisation with speed settings, stereo sound types, and visuals.	4+	Medical		Y							Y			Y
EMDR 101	follow the dot…	4.7*	3		7.99	Designed for seasoned practitioners and users to customise EMDR sessions	12+	Medical		Y			Y				Y			Y
F.I.R.S.T Support	Stress & trauma Response	Nil	N/A	Y		App is described as 100% research-based, customised-to-users, with 24/7 access. Resources included to help users cope, build resilience and regulate mental health.	17+	Health & Fitness				Y	Y			Y	Y			Y
Finch: Self Care Widget Pet	Daily Journal & Habit Tracker	4.9*	1.5k	Y		Daily self-care app where users care for a 'pet' as their self care ritual. Intended to increase resilience, productivity and gratitude.	4+	Health & Fitness				Y	Y	Y		Y	Y			Y
First - First Responder Health	Protect Against Trauma	Nil	N/A	Y		Designed for first responders including police officers, firefighters, medical professionals, EMS workers, search and rescue specialists and military personnel. App includes tracking missions and calls they've responded to, evaluate stress and how to protect themselves from stress in their line of duty.	4+	Health & Fitness				Y	Y		Y	Y	Y
GO EFT TAPPING - Reduce Stress	Instant stress reduction	4.8*	12	Y		Desgined to help users reduce stress, worry, anger, frustration, fear, and sadness through guided tapping instructions.	4+	Health & Fitness			Emotional Focused Therapy Tapping (EFT-T)		Y			Y	Y
iChill	Guided wellness skills	5*	1	Y		Developed by the Trauma Resource Institute Inc. to guide children, teens and adults utilising the community wellness model.	4+	Health & Fitness			Community Wellness Model		Y					Y
Insomnia Coach	Help improve your sleep.	Nil	N/A	Y		Developed by US Department of Veterans Affairs (VA) and designed for veterans, military service members, and others suffering from insomnia.	12+	Health & Fitness	Y		Cognitive Behavioral Therapy for Insomnia (CBT-i)		Y	Y		Y	Y	Y			Personalised feedback from 'Sleep' coaches.
KidTrauma	Medical	Nil	N/A	Y		An application for parents/carers to support their child in the early aftermath of a traumatic event.	4+	Medical				Y	Y		Y		Y	Y	Y
Loving The Self Affirmations	Self Love and Heal Trauma	4.8*	4	Y		Daily messages and a series of themes for users dealing with behavioral issues which include wallpapers and notifications.	4+	Health & Fitness				Y	Y
Meomind - Free Therapy	Personalised, recorded therapy	Nil	N/A	Y		Therapy library of recorded sessions by experienced therapists for users to listen to. Recorded therapy sessions covers a range of issues such as anxiety, depression, stress, sleep and trauma.	4+	Health & Fitness					Y				Y				Access to app-community
MiLTRiM	Health & Fitness	Nil	N/A	Y		Trauma Risk Management - Military Edition is a peer delivered psychological support system designed to allow organisations to proactively support personnel in the wake of traumatic events.	12+	Health & Fitness			TRiM trauma-focused peer support system (Military version)		Y					Y
MindFit.ai	Fit your mind, value yourself	Nil	N/A	Y		MindFit is mobile fitness based on CBT for fixing your perception to improve positive mindset, assertiveness and goal setting.	12+	Health & Fitness	Y						Y		Y				Self-assessments with the app's artificial intelligence to understand yourself better.
Mira Trauma and PTSD Support	Symptom Management and Support	2*	1	Y		Self-help app to manage trauma symptoms and PTSD. Includes Exercises, trigger, symptom tracking, analytics to record user progress, emergency hotlines, resources and more.	12+	Health & Fitness				Y	Y	Y		Y	Y	Y			Free 14 day trial. Renewal starts from $7.99 for the first month and increases to $12.99.
Mission Reconnect	For Veterans and Partners	Nil	N/A	Y		Designed to support Veterans and their partners with mind and body programs that support physical, mental and relationship health to reduce PTSD, anxiety, depression, stress, increase resilience and self-compassion. Users can only utilise the app after creating an account from the website.	17+	Health & Fitness			PTSD-informed		Y				Y	Y
MOODA	Time to face myself	4.8*	34		1.49	A mood tracking app to improve emotional wellbeing. One option includes shaking your phone to track your dominant feelings.	4+	Lifestyle				Y		Y		Y					Option to share your feelings with contacts
Mooditude: Self-care App	Track & improve your mood	5*	5	Y		Mooditude is utilised by clinicians and users to monitor your mood and mental health. The app has three stages. Step 1: Take a mental health test. Step 2: Personliased self-care plan. Step 3: MH tracking and monitoring.	4+	Medical				Y	Y		Y	Y	Y	Y	Y	Y	Access to app-community
Moodnotes - Mood Tracker	Self-care & CBT Journal	4.5*	616	Y		Mood Tracker and journaling app to improve thinking habits.	12+	Health & Fitness	Y		Positive Psychology		Y	Y		Y	Y	Y			Uses imaging recognition to scan facial emotions
Mood Balance - Self-care	Self-care & relaxing games	4.3*	1.2k	Y		Designed to help you query your feelings, their causes and the resultant negative moods experienced. First, users select an emotion, define it and document the time and date. Then, users can explore games to challenge and soothe their emotions.	4+	Health & Fitness				Y	Y	Y		Y	Y			Y	Free 3-day trial. Monthly $9.99; Yearly $59.99
MyREBOOT	REBOOT Recovery	Nil	N/A	Y		Online community for people impacted by trauma and mental health challenges. Access to online courses related to trauma healing, lifeguides, podcasts and blogs.	4+	Lifestyle				Y	Y				Y				Includes podcasts and blogs
Overcome pain based on EMDR	Based on EMDR	3.9*	7		9.99	Comprises of 3 playlists for controlling pain and associated stress that maintain pain. Playlist are desgined with different goals across mental health strategies, sensory healing and stress management.	4+	Health & Fitness		Y			Y				Y
P247	Psychcare App	Nil	N/A	Y		Psychcare 24/7 is an online counselling service. Users must first register an account on the main website. Developed by the Trauma Centre of Australia	4+	Health & Fitness				Y							Y
Paramedic Trauma Review	Medical	Nil	N/A		9.99	Designed for paramedics to be an in-class review during trauma modules or focused practice before examinations. Includes content on physical and mental health trauma delivery.	17+	Medical				Y	Y				Y
PE Coach 2	Health & Fitness	Nil	N/A	Y		PE coach is to be used during therapy for Post-traumatic stress disorder. The app guides you through exercises assigned by your therapist. Created by the US Departent of Veterans Affairs (VA)	12+	Health & Fitness			Prolonged Exposure Therapy (PE)					Y	Y
PFA Mobile	Health & Fitness	Nil	N/A	Y		PFA assist responders who provide psychological first aid to adults, families and children as part of an organisational effort. Developed by the US Department of Veterans Affairs in partnership with the National Child Traumatic Stress Network (NCTSN) and DoD's National Center for Teleheath &. Technology.	4+	Health & Fitness			Psychological First Aid frameworks (PFA)						Y	Y	Y
PolTRiM	Health & Fitness	Nil	N/A	Y		Police Trauma and Resillience Management is a police specific TRiM programme. It provides knowledge of the TRiM Risk Factors and a structured methodology for TRiM implementation.	12+	Health & Fitness			TRiM (Police version)		Y				Y	Y			Provides information on future courses including documentation, maps and location details. Allows users to print, share and email necessary documents for your role as a PolTRiM Practitioner.
PTSD Coach	Health & Fitness	4.4*	21	Y		Designed for users with diagnosed or may have PTSD. The app includes psychoeducation, helfup resources, a self-assessment for PTSD, and tools to help users manage their symptoms. Developed by the US Department of Veterans Affairs.	12+	Health & Fitness			PTSD-informed strategies		Y		Y		Y	Y	Y	Y
PTSD Coach Australia	Health & Fitness	3.7*	6	Y		Designed to help users understand and manage PTSD symptoms and disorder. This is the Australian version based on the latest scientific understandings of PTSD and modified from the US Department of Veterans Affairs PTSD Coach app.	12+	Health & Fitness			PTSD-informed strategies		Y		Y	Y	Y	Y	Y	Y	Includes a scheduler to allo users to plot the results and email them to health professionals.
PTSD Family Coach	Health & Fitness	Nil	N/A	Y		PTSD Family Coach is designed for family members of those living with Post-traumatic Stress Disorder. This app conists of 24 unique tools to help users manage stress, exercises and tools to rebuild social networks. Information revolves around content on how to practice self-care, taking care of your relationships and loved ones.	12+	Health & Fitness			PTSD-informed strategies		Y			Y	Y	Y			Progress tracking includes goals plotted on a timeline. In-built with links to social media where users can join community discussions (E.g. by linking their Twitter account).
PTSD Free	3 Keys to Live PTSD Free	Nil	N/A	Y		Certified by The American Institute of Stress, PTSD Free is created for veterans, soldiers, and anyone suffering from PTSD through a 3-tiered solution. Key features include 1. Stopper Tab - one-touch instant relief to manage random stress reactions, 2. MyMeds Tab - structures and maintains medication practice, and 3. Resolve Tab - a revolutionary tool to process traumatic memories that fuel PTSD …	4+	Health & Fitness			PTSD-informed strategies		Y			Y	Y	Y	Y		Membership includes 24/7 access to online relaxation tools on PC and Mobile. Users can link their social profiles to the app and access the app's community.
PTSD Test	Post-traumatic Stress Disorder	4.8*	20	Y		Designed to evaluate your symptoms of PTSD with a scientifically-supported 20-question screening test (PCL-5, based on the PTSD-checklist for DSM-5).	12+	Medical			PCL-5 Test		Y		Y	Y		Y			Includes reminders for users to re-take the assessment and track progress.
PTSD Test (PCL)	Post-traumatic Stress Disorder	Nil	N/A	Y		This app is a self-evaluation test for Post-Traumatic Disorder based on 17-questions for diagnosing, monitoring and measuring the severity of PTSD.	12+	Health & Fitness			PCL Test				Y	Y		Y	Y		Upon completion of test, results will be displayed with an option for users to "find help" or "remind me weekly".
PTSD Toolkit for Nurses	Health & Fitness	Nil	N/A	Y		This app is a tool-kit designed for nurses to treat veterans with PTSD. It provides clinical information and interactive simulations. Developed by the American Nurses Foundation (ANF) and Penn Nursing Science in partnership with Lippincott Solutions team.	17+	Health & Fitness			PTSD-informed for Veterans		Y		Y		Y	Y	Y		Nurses are able to 'test their knowledge' through interactive simulations. Materials include recent case studies.
R U Suicidal?	Health & Fitness	3*	2	Y		R U Suicidal? Helps users who may be or is suicidal through recorded videos of psychologist guiding you through phases to stabilise safety.	4+	Health & Fitness				Y	Y			Y	Y		Y		Users can store confidential information in the app that can be used with a clinician.
RailRes	Health & Fitness	5*	4	Y		RailRes has been developed by the TrackSAFE Foundation for the Australian rail industry. It aims to assis rail employees to manage their immediate responses to stress and help build resilience.	12+	Health & Fitness				Y	Y		Y	Y	Y	Y	Y		Users can access Employee Assistance Program (EAP) directly from the app.
Reflectly - Journal & AI Diary	Mood Tracker & Daily Quotes	4.3*	6k	Y		Reflectly is a journaling app and mood tracker accompanied by an AI to prompt your reflections.	4+	Health & Fitness	Y		Positive Psychology & Mindfullness			Y		Y				Y	App provides daily motivational quotes and reminders personalised to users based on the in-built algorithm.
Rethinker	Cognitive self-therapy	Nil	N/A	Y		Rethinker helps users cope with stressful or triggering situations. Users describe a situation and are given examples situations to explore their thoughts in that situation. These self-activities enable users to compare their evaluation of the event with what is reasonable, positive and negative thought process followed by self-evaluation.	4+	Medical	Y					Y		Y
S.T.A.R. Support	Stress, Trauma and Resiliency	Nil	N/A	Y		App that provides tailored mental health resources for individuals and organisations. The app supports teams of responders, medical professionals, addiction care specialists and individuals to decrease burnout, turnover and increase team well-being and productivity. Backed by research completed at Ohio State University, USA.	17+	Health & Fitness				Y	Y		Y	Y	Y	Y	Y
Self Help for Trauma	Self Tapping Step-by-step	3.7*	3	Y		Available in 33 languages, this app displays visuals to enable users to manage trauma symptoms through the application of Trauma Tapping Technique (TTT). TTT is an efficient and scalable non-verbal First Aid.	12+	Medical			EFT-T		Y				Y
Self-Love	Self-care by CPT & Art Therapy	Nil	N/A	Y		This app is built on the content of self-parenting, a concept that has helped trauma survivors to establish healthy coping skills. The app asks users questions about flashbacks, triggers, and stresses in order to facilitate re-connection with their feelings, body and inner child. A combination of cognitive processing therapy and art therapy are applied in the exercises.	4+	Health & Fitness			Cognitive Processing Therapy (CPT) & Art Therapy		Y	Y			Y
Shadow's Edge	Art, Journaling, Shadow fights	Nil	N/A	Y		Shadow's Edge is the only mental health game (at time of data collection) where users defeat their personalised shadows in epic battles. Writing prompts are based on Narrative Therapy and Positive Psychology. Developed by The Digging Deep Project, an award-winning non-profit with a mission to create mental health tools that are based on expression, psychology and gaming.	12+	Casual			Narrative Therapy, Art Therapy & Positive Psychology			Y			Y			Y	Ad-free game with no in-app purchases.
Sleep Restore	Based on EMDR	4.4*	22	Y		Guided meditations + bilateral stimulation (BLS - based on EMDR). Audio sessions for getting to sleep and getting back to sleep; overcoming worry, tension and insomnia. Customisation of sessions available.	4+	Health & Fitness		Y			Y		Y		Y
Solfeggio Root Chakra 396Hz	Cleanse Guilt, Fear & Trauma	Nil	N/A	Y		This app plays low and smooth frequency that helps cleanse feelings of guilt, fear, and trauma associated with Muladhara (root) Chakra.	4+	Health & Fitness			Meditation						Y			Y
STAIR Coach	Help manage your emotions	Nil	N/A	Y		Self-help course based on Skills Training in Affective & Interpersonal Regulation (STAIR).	12+	Health & Fitness			Skills Training in Affective & Interpersonal Regulation (STAIR)		Y	Y		Y	Y		Y	Y
Stoic	How are you feeling?	4.8*	1.4k	Y		Everyday Stoic prepares bite-sized mental health exercises and fragments from books to help users deal with obstacles they face. It is a mental health tracker companion for mood tracking, journaling, meditations and reflection. The algorithm analyses users emotive influences and provides insights.	4+	Health & Fitness				Y		Y		Y	Y				Inspirational quotes and reminders are delivered to users.
Stress Less TRE	Medical	1*	1		14.99	Stress Less by TRE stands for tension & trauma Releasing Exercises to release stress/tension from the body accumulated from everyday difficult situations, immediate or prolonged situations or traumatic life eperiences.	12+	Medical			Tension & Trauma Releasing techniques		Y			Y	Y
Support Base	Support your treatment journey	Nil	N/A	Y		Support Base is a smartphone app designed to support frontline workers receiving clinical treatment for PTSD and other mental health conditions. The app includes core elements adapted from an evidenced-based, gold-standard PTSD treatment program by the UNSW Traumatic Stress Clinic. The app features are designed to be used in combination with structured therapy delivered in person or via telehealt…	17+	Health & Fitness			PTSD-informed strategies, Cognitive Restructuring & Explosure Therapy		Y			Y	Y		Y	Y
Tap For Joy	Tap into a stress-free life	Nil	N/A	Y		Tap For Joy is a resource for those who have PTSD. It uses an adaptaion of Eutaptics which rewires the brain and eases the pain from lingering trauma. The app guides you through meditations accompanid by acupressure tapping to reduce stress, anxiety, and increase calmness and happiness.	4+	Health & Fitness			EFT-T		Y	Y		Y	Y			Y
The Field Guide	because science is right	Nil	N/A	Y		The Field Guide is a psychosocial support and community mental health tool for those affected by stress and trauma with two main objectives: 1. To clarify why and how adverse experiences can affect the brain, body and social behavior, and 2. To provide specific information and exercises to confront the effects of stress, trauma and build resilience.	4+	Education				Y	Y				Y				Communicty based and requires an account.
The Pheonix Project	Let's Rise Together	Nil	N/A	Y		Phoenix is a caring digital community that supports mental health and wellness. The app includes modern tools and a collective care model to support users with their mental health progress.	12+	Health & Fitness				Y	Y					Y			Includes events and experiences that users have options to access.
The Place We Find Ourselves	Lifestyle	4.9*	8	Y		A podcast app that features private practice Adam Young and interview guests as they discuss all matters related to story, trauma, attachment, and interpersonal neurobiology. Each episode unpacks how trauma and abuse impacts the heart and mind, by giving users a glimpse of lived experiences of the guests.	17+	Lifestyle			Trauma informed & neurobiology		Y					Y			Settings include the 'share' function, reminders and contacts.
Think: Mental Health Journal	Diary for anxiety/marriage/ocd	4.5*	2	Y		Think analyzes thoughts to help users undesrtand themselves and improve their lives. It uses artificial intelligence what you write and how you write and provides analysis instantly.	4+	Lifestyle				Y		Y		Y					Ad-free
Trauma Brace	Self help after trauma	Nil	N/A	Y		Brace was developed by a PTSD survivor and is ann app program to help users struggling after experiencing a trauma. Based on techniques that have been proven to reduce symptoms. Examples of traumatic experiences are combat, assault, terrorism, severe accident, loss of a loved one, abuse, life-threatening ilnness, healthcare maltreatment, natural disasters etc. Brace is marketed as a self-care app…	17+	Health & Fitness			PTSD-informed		Y	Y		Y	Y
Trauma Healing Yoga	Trauma Healing Yoga Therapy	Nil	N/A	Y		Designed to help sexually traumatised women to use yoga therapy (and other holistic, science-based techniques) to release and heal trauma.	17+	Health & Fitness			Trauma Healing Yoga Therapy		Y				Y	Y
Trauma Informed Care	Health & Fitness	Nil	N/A	Y		Designed to support caregivers and professionals in responding to trauma's impact on development and focuses. Includes Trauma Informed Care resources from a variety of sources.	17+	Health & Fitness			Trauma-informed Care		Y
Trauma Informed Prevention	TIPS	Nil	N/A	Y		Designed to be incorporated into trauma-focused therapy by clinicians with adolescent clients (13-18). The TIPS app focuses on prevention of risk behaviors that may arise following a traumtic event. App is intended for information, education and research purposes only.	17+	Health & Fitness			Trauma-focused therapy		Y				Y		Y
Trauma Logbook	Manage Intrusive Memories	Nil	N/A	Y		Research App assessing daily intrusive memories in individuals having experiences a traumatic event. Does not work unless you are an active study participant.	4+	Medical				Y		Y					Y
Trauma Recovery	Health & Fitness	Nil	N/A	Y		Trauma Recovery Coach is for anyone who has recently experienced a traumatic event. This app provides training and tools to practice six skills that are helpful for trauma recovery. Developed by the Palo Alto Veterans Institute for Research.	4+	Health & Fitness				Y	Y				Y	Y	Y	Y
TraumaCall	Lifestyle	Nil	N/A	Y		TraumaCall is a subscription based app that puts its members in touch with nearby counsellors. It allows members to select counsellors based on expertise and proximity. The app functionality allows the counsellor to accept or decline member requests, and counsellors can navigate their way to the members based on the location from within the app.	12+	Lifestyle				Y							Y		Subscriptioin based app to connect members to counsellors.
TraumaMAMAs	Tools for Mamas after Trauma	Nil	N/A	Y		App provides tools and resources for mothers who have experienced trauma. Access to trauma-experts that answers questions, monthly toolkits, weekly resources, podcasts, and links to global hotlines/helplines.	4+	Education				Y									App is free to download but requires a subscription fee to access all content.
Trigger Stop	Sensory and Emotional Check-In	Nil	N/A	Y		An app adults can use with and for children to express the sensations in their body with the emotions they are experiencing. The use of the app supports sensory and emotional identification and literacy which enables a child to have the ability to identify, understand and express sensations/feelings in a healthy way. the app allows users to customise a visual person by choosing colors and emotion…	4+	Education			Sensory and Image Identification			Y			Y
VetChange	Help with drinking and stress	Nil	N/A	Y		VetChange is an app designed for veterans, service members and anybody who is concerned about their drinking and how it relates to stress. This app can be useful for developing healthier drinking behaviors, gain insight into the correlation between drinking and moods/situations, use the app's interactive tools to manage stress and drinking, learn about alcohol usage and posttraumatic stress and t…	17+	Health & Fitness				Y	Y	Y		Y	Y	Y
We Love Trauma	A Game to Build connections	Nil	N/A		10.99	This app is a game designed around the body of research showing that vulnerability builds trust and fosters connections and those acts of connections including a safe space for users (that have been formed or caused by trauma) to interact. The goal of this game builds awareness of the ways different stressors and life events impact our mental health including how to communicate comfortably about …	12+	Health & Fitness				Y		Y			Y	Y		Y
Worrydolls	Tiny dolls to remove anxiety	4.8*	1.2k	Y		Worrydolls provides a small doll who is ready to listen to what is worrying users. Worrydolls is used like ajournal to help users overcome anxiety and stress. Developed based on mindfulness, cognitive behavioural therapy and magic.	4+	Health & Fitness	Y		Mindfulness & Cognitive Behavioral Therapy (CBT)			Y		Y

## Sheet: Prior trauma screen (n  88)
App Name	Sub-heading descriptor	Rating	No. of ratings	App availability		Description	Sub-descriptors		Therapeutic Background				Content (Type of Technique)
				Free	Paid (AUD)		Age	Category	CBT	EMDR	Other	Not specified	Psychoeducation / Information	Self-reflection / Journaling	Clinical Assessment / Self-tests	Symptom Management / Progress Tracking	Courses / Training / Guided sessions / Activities	Tips / Advice / Resources	Links to services /Access to Clinicians / Referals	Option for in app customisation / Personalisation	Other
5 Minute Journal: Self-care	Daily Gratitude & Mood Tracker	5*	1.2k	Y		The Five Minute Journal uses proven principles of positive psychology to make you happier in 5 minutes a day with gratitude journaling format.	4+	Health & Fitness			Positive Psychology			Y						Y
ACE's	Adverse Childroom Experiences	Nil	N/A		7.99	Adverse childhood experiences questionnaire and resources.	12+	Medical			ACE's Questionnaire		Y					Y
ACT Coach	Acceptance and commitment	3*	2	Y		For veterans, service members, and others who are in Acceptance and Commitment Therapy in consultation with a therapist.	12+	Health & Fitness			Acceptance and Commitment Therapy (ACT)		Y			Y	Y	Y
AfterTrauma	Traumatic Injury Recovery Help	Nil	N/A	Y		Co-designed with survivors, carers, doctors, and therapists. App is advised for users seeking to rebuild their lives after serious injury and emotional impact.	12+	Health & Fitness				Y	Y			Y				Y	Chat feature to connect with other survivors and carers.
Anxiety Release based on EMDR	Health & Fitness	4.3*	30		7.99	Based on BLS which includes brain training, anxiety management sessions, pure bilateral stimulation and safe place exercise. Recommended for clinicians and clients.	4+	Health & Fitness		Y						Y	Y
APN Connection	Virtual Therapy + Peer Support	Nil	N/A	Y		Platform to connect users in recovery from addiction, mental health and trauma.	17+	Health & Fitness				Y	Y					Y	Y		Connects users to therapy groups, therapists and support community. App functions allow users to schedule, manage and join virtual sessions.
Awaken Me - Emotions	Deal with your trauma.	Nil	N/A	Y		Self-reflection app that prompts questions related to trauma, fears and triggers.	9+	Health & Fitness				Y	Y	Y
Bloom: CBT Therapy & Self-care	Daily Mental Health Coach	4.8	1.1k	Y		Provides daily mental health videos based on the results of your personalised algorithm when users begin.	4+	Health & Fitness	Y				Y	Y			Y			Y
Bloom Coaching	Healing from betrayal trauma	Nil	N/A	Y		The Bloom coaching app accompanies users' gain education and understand their need to heal through simple and easy-to-follow assignments. App includes guided curriculum of videos and assignments which addresses: understanding your story, how trauma works, self care, udnerstanding addiction, trust, disclosure, boundaries and forgiveness.	17+	Education				Y	Y				Y				Guided curriculum with self-assignments
Bounce Back Now	Health & Fitness	Nil	N/A	Y		Developed to support users' emotional recovery affected by traumatic events.	12+	Health & Fitness				Y	Y	Y		Y	Y
Bright Path	Education	Nil	N/A	Y		This app is a research mobile tool designed to offer additional support to teens and adolescents in therapy for mental health and substance disorders.	12+	Health & Fitness				Y	Y			Y		Y
BSDR Player	Health & Fitness	5*	1		7.99	App generates bilateral sounds desensitization (EMDR technqiue) to help users process past emotional experiences. Developed to aid the treatment of trauma symptoms.	12+	Health & Fitness		Y							Y
Calm and Confident	Relax and reconnect	5*	10		7.99	Comprises 10 guided meditations based on trauma therapy principles. EMDR.	4+	Health & Fitness		Y	Trauma principles, based on neuroscience						Y
CBT Thought Diary	Mood Tracker & Therapy Journal	5*	636	Y		Desgigned to help users self-reflect with daily prompts and trakc their mood and negative thoughts.	12+	Medical	Y		Acceptance Commitment Therapy (ACT), Dialectic Behavioral Therapy (DBT), Positive Psychology		Y	Y		Y
Couple HOPES	Lifestyle	Nil	N/A	Y		Uses an online PTSD intervention to help couples improve their PTSD symptoms and relationship with the support of a coach.	12+	Lifestyle			PTSD-informed interventions for couples		Y				Y		Y
CPT Coach	Cognitive Processing Therapy	Nil	N/A	Y		App is prescribed to clients who are participating in Cognitive Processing Therapy (for PTSD) with a mental health professional. The app provides supplemental materials to support individuals in therapy.	12+	Health & Fitness			Cognitive Provessing Therapy (CPT)		Y			Y	Y		Y
Curable	Chronic Pain Relief	4.7*	99	Y		Free chat with virtual coach to design a customised program tailored to users symptoms and preferences.	17+	Medical				Y	Y				Y		Y	Y
Dialogue Network	Moral injury social network	Nil	N/A	Y		Online network around the subject of moral injury for women veterans and families.	12+	Social Networking										Y			Post featured content, set up groups, host events, sponsor feeds
EMDR	Look. Listen. Feel	Nil	N/A	Y		App provides EMDR therapy through personal customisation with speed settings, stereo sound types, and visuals.	4+	Medical		Y							Y			Y
EMDR 101	follow the dot…	4.7*	3		7.99	Designed for seasoned practitioners and users to customise EMDR sessions	12+	Medical		Y			Y				Y			Y
EyeMoveX.a - EMDr Sessions	Reduce your bad memories	5*	4	Y		Designed to alleviate symptoms of PTSD, trauma, panic disorder, phobia, relaxation and so on. App instructs users to open animations for EMDR sessions through OpenGL or download the Android version.	12+	Medical		Y			Y								Provides instructions on how to customise visuals, including color and speed for personalised EMDR sessions.
EyeMoveX.as - EMDR Sessions	Reduce your bad memories	3*	1		4.49	Designed to alleviate symptoms of PTSD, trauma, panic disorder, phobia, relaxation and so on. App instructs users to open animations for EMDR sessions through OpenGL or download the Android version.	12+	Medical		Y			Y								App description is identical to EyeMoveX.a (free version). This paid version is ad-free.
F.I.R.S.T Support	Stress & trauma Response	Nil	N/A	Y		App is described as 100% research-based, customised-to-users, with 24/7 access. Resources included to help users cope, build resilience and regulate mental health.	17+	Health & Fitness				Y	Y			Y	Y			Y
Finch: Self Care Widget Pet	Daily Journal & Habit Tracker	4.9*	1.5k	Y		Daily self-care app where users care for a 'pet' as their self care ritual. Intended to increase resilience, productivity and gratitude.	4+	Health & Fitness				Y	Y	Y		Y	Y			Y
First - First Responder Health	Protect Against Trauma	Nil	N/A	Y		Designed for first responders including police officers, firefighters, medical professionals, EMS workers, search and rescue specialists and military personnel. App includes tracking missions and calls they've responded to, evaluate stress and how to protect themselves from stress in their line of duty.	4+	Health & Fitness				Y	Y		Y	Y	Y
FML - FMyLife	Daily dose of trauma dumping	Nil	N/A	Y		Social network platform for users to vent their misfortunes. Admin then selects daily mishaps and embarassments and features them.	12+	Entertainment				N/A									Social platform to discuss mishaps and misfortunes.
GO EFT TAPPING - Reduce Stress	Instant stress reduction	4.8*	12	Y		Desgined to help users reduce stress, worry, anger, frustration, fear, and sadness through guided tapping instructions.	4+	Health & Fitness			Emotional Focused Therapy Tapping (EFT-T)		Y			Y	Y
iChill	Guided wellness skills	5*	1	Y		Developed by the Trauma Resource Institute Inc. to guide children, teens and adults utilising the community wellness model.	4+	Health & Fitness			Community Wellness Model		Y					Y
Insomnia Coach	Help improve your sleep.	Nil	N/A	Y		Developed by US Department of Veterans Affairs (VA) and designed for veterans, military service members, and others suffering from insomnia.	12+	Health & Fitness	Y		Cognitive Behavioral Therapy for Insomnia (CBT-i)		Y	Y		Y	Y	Y			Personalised feedback from 'Sleep' coaches.
KidTrauma	Medical	Nil	N/A	Y		An application for parents/carers to support their child in the early aftermath of a traumatic event.	4+	Medical				Y	Y		Y		Y	Y	Y
Loving The Self Affirmations	Self Love and Heal Trauma	4.8*	4	Y		Daily messages and a series of themes for users dealing with behavioral issues which include wallpapers and notifications.	4+	Health & Fitness				Y	Y
Man Down UK	Health & Fitness	Nil	N/A	Y		Support mechanism platform providing immediate mental health wellbeing assistance for those suffering from issues associated with complex post-traumatic stress.	4+	Health & Fitness				Y						Y	Y
Meomind - Free Therapy	Personalised, recorded therapy	Nil	N/A	Y		Therapy library of recorded sessions by experienced therapists for users to listen to. Recorded therapy sessions covers a range of issues such as anxiety, depression, stress, sleep and trauma.	4+	Health & Fitness					Y				Y				Access to app-community
MiLTRiM	Health & Fitness	Nil	N/A	Y		Trauma Risk Management - Military Edition is a peer delivered psychological support system designed to allow organisations to proactively support personnel in the wake of traumatic events.	12+	Health & Fitness			TRiM trauma risk and Stress management (Military version)		Y					Y
MindFit.ai	Fit your mind, value yourself	Nil	N/A	Y		MindFit is mobile fitness based on CBT for fixing your perception to improve positive mindset, assertiveness and goal setting.	12+	Health & Fitness	Y						Y		Y				Self-assessments with the app's artificial intelligence to understand yourself better.
Mira Trauma and PTSD Support	Symptom Management and Support	2*	1	Y		Self-help app to manage trauma symptoms and PTSD. Includes Exercises, trigger, symptom tracking, analytics to record user progress, emergency hotlines, resources and more.	12+	Health & Fitness				Y	Y	Y		Y	Y	Y			Free 14 day trial. Renewal starts from $7.99 for the first month and increases to $12.99.
Mission Reconnect	For Veterans and Partners	Nil	N/A	Y		Designed to support Veterans and their partners with mind and body programs that support physical, mental and relationship health to reduce PTSD, anxiety, depression, stress, increase resilience and self-compassion. Users can only utilise the app after creating an account from the website.	17+	Health & Fitness					Y				Y	Y
MOODA	Time to face myself	4.8*	34		1.49	A mood tracking app to improve emotional wellbeing. One option includes shaking your phone to track your dominant feelings.	4+	Lifestyle				Y		Y		Y					Option to share your feelings with contacts
Mooditude: Self-care App	Track & improve your mood	5*	5	Y		Mooditude is utilised by clinicians and users to monitor your mood and mental health. The app has three stages. Step 1: Take a mental health test. Step 2: Personliased self-care plan. Step 3: MH tracking and monitoring.	4+	Medical				Y	Y		Y	Y	Y	Y	Y	Y	Access to app-community
Moodnotes - Mood Tracker	Self-care & CBT Journal	4.5*	616	Y		Mood Tracker and journaling app to improve thinking habits.	12+	Health & Fitness	Y		Positive Psychology		Y	Y		Y	Y	Y			Uses imaging recognition to scan facial emotions
Mood Balance - Self-care	Self-care & relaxing games	4.3*	1.2k	Y		Designed to help you query your feelings, their causes and the resultant negative moods experienced. First, users select an emotion, define it and document the time and date. Then, users can explore games to challenge and soothe their emotions.	4+	Health & Fitness				Y	Y	Y		Y	Y			Y	Free 3-day trial. Monthly $9.99; Yearly $59.99
MyREBOOT	REBOOT Recovery	Nil	N/A	Y		Online community for people impacted by trauma and mental health challenges. Access to online courses related to trauma healing, lifeguides, podcasts and blogs.	4+	Lifestyle				Y	Y				Y				Includes podcasts and blogs
obimy	Lifestyle	4*	336	Y		Free tool to interact with your partner, friends and relatives by sending hugs, kisses, slaps and other actions. Feel your partner's heart rate, track moods and walked steps.	4+	Lifestyle				Y				Y					Social platform to send emotions.
Overcome pain based on EMDR	Based on EMDR	3.9*	7		9.99	Comprises of 3 playlists for controlling pain and associated stress that maintain pain. Playlist are desgined with different goals across mental health strategies, sensory healing and stress management.	4+	Health & Fitness		Y			Y				Y
P247	Psychcare App	Nil	N/A	Y		Psychcare 24/7 is an onine counselling service. Users must first register an account on the main website. Developed by the Trauma Centre of Australia	4+	Health & Fitness				Y							Y
Paramedic Trauma Review	Medical	Nil	N/A		9.99	Designed for paramedics to be an in-class review during trauma modules or focused practice before examinations. Includes content on physical and mental health trauma delivery.	17+	Medical				Y	Y				Y
PE Coach 2	Health & Fitness	Nil	N/A	Y		PE coach is to be used during therapy for Post-traumatic stress disorder. The app guides you through exercises assigned by your therapist. Created by the US Departent of Veterans Affairs (VA)	12+	Health & Fitness			Prolonged Exposure Therapy (PE)					Y	Y
PFA Mobile	Health & Fitness	Nil	N/A	Y		PFA assist responders who provide psychological first aid to adults, families and children as part of an organisational effort. Developed by the US Department of Veterans Affairs in partnership with the National Child Traumatic Stress Network (NCTSN) and DoD's National Center for Teleheath &. Technology.	4+	Health & Fitness			Psychological First Aid frameworks (PFA)						Y	Y	Y
PolTRiM	Health & Fitness	Nil	N/A	Y		Police Trauma and Resillience Management is a police specific TRiM programme. It provides knowledge of the TRiM Risk Factors and a structured methodology for TRiM implementation.	12+	Health & Fitness			TRiM trauma risk and Stress management (Police version)		Y				Y	Y			Provides information on future courses including documentation, maps and location details. Allows users to print, share and email necessary documents for your role as a PolTRiM Practitioner.
PTSD Coach	Health & Fitness	4.4*	21	Y		Designed for users with diagnosed or may have PTSD. The app includes psychoeducation, helfup resources, a self-assessment for PTSD, and tools to help users manage their symptoms. Developed by the US Department of Veterans Affairs.	12+	Health & Fitness			PTSD-informed strategies		Y		Y		Y	Y	Y	Y
PTSD Coach Australia	Health & Fitness	3.7*	6	Y		Designed to help users understand and manage PTSD symptoms and disorder. This is the Australian version based on the latest scientific understandings of PTSD and modified from the US Department of Veterans Affairs PTSD Coach app.	12+	Health & Fitness			PTSD-informed strategies		Y		Y	Y	Y	Y	Y	Y	Includes a scheduler to allo users to plot the results and email them to health professionals.
PTSD Family Coach	Health & Fitness	Nil	N/A	Y		PTSD Family Coach is designed for family members of those living with Post-traumatic Stress Disorder. This app conists of 24 unique tools to help users manage stress, exercises and tools to rebuild social networks. Information revolves around content on how to practice self-care, taking care of your relationships and loved ones.	12+	Health & Fitness			PTSD-informed strategies		Y			Y	Y	Y			Progress tracking includes goals plotted on a timeline. In-built with links to social media where users can join community discussions (E.g. by linking their Twitter account).
PTSD Free	3 Keys to Live PTSD Free	Nil	N/A	Y		Certified by The American Institute of Stress, PTSD Free is created for veterans, soldiers, and anyone suffering from PTSD through a 3-tiered solution. Key features include 1. Stopper Tab - one-touch instant relief to manage random stress reactions, 2. MyMeds Tab - structures and maintains medication practice, and 3. Resolve Tab - a revolutionary tool to process traumatic memories that fuel PTSD …	4+	Health & Fitness			PTSD-informed strategies		Y			Y	Y	Y	Y		Membership includes 24/7 access to online relaxation tools on PC and Mobile. Users can link their social profiles to the app and access the app's community.
PTSD Test	Post-traumatic Stress Disorder	4.8*	20	Y		Designed to evaluate your symptoms of PTSD with a scientifically-supported 20-question screening test (PCL-5, based on the PTSD-checklist for DSM-5).	12+	Medical			PCL-5 Test		Y		Y	Y		Y			Includes reminders for users to re-take the assessment and track progress.
PTSD Test (PCL)	Post-traumatic Stress Disorder	Nil	N/A	Y		This app is a self-evaluation test for Post-Traumatic Disorder based on 17-questions for diagnosing, monitoring and measuring the severity of PTSD.	12+	Health & Fitness			PCL Test				Y	Y		Y	Y		Upon completion of test, results will be displayed with an option for users to "find help" or "remind me weekly".
PTSD Toolkit for Nurses	Health & Fitness	Nil	N/A	Y		This app is a tool-kit designed for nurses to treat veterans with PTSD. It provides clinical information and interactive simulations. Developed by the American Nurses Foundation (ANF) and Penn Nursing Science in partnership with Lippincott Solutions team.	17+	Health & Fitness			PTSD-informed for Veterans		Y		Y		Y	Y	Y		Nurses are able to 'test their knowledge' through interactive simulations. Materials include recent case studies.
R U Suicidal?	Health & Fitness	3*	2	Y		R U Suicidal? Helps users who may be or is suicidal through recorded videos of psychologist guiding you through phases to stabilise safety.	4+	Health & Fitness				Y	Y			Y	Y				Users can store confidential information in the app that can be used with a clinician.
RailRes	Health & Fitness	5*	4	Y		RailRes has been developed by the TrackSAFE Foundation for the Australian rail industry. It aims to assis rail employees to manage their immediate responses to stress and help build resilience.	12+	Health & Fitness					Y		Y	Y	Y	Y			Users can access Employee Assistance Program (EAP) directly from the app.
Reflectly - Journal & AI Diary	Mood Tracker & Daily Quotes	4.3*	6k	Y		Reflectly is a journaling app and mood tracker accompanied by an AI to prompt your reflections.	4+	Health & Fitness	Y		Positive Psychology & Mindfullness			Y		Y				Y	App provides daily motivational quotes and reminders personalised to users based on the in-built algorithm.
Rethinker	Cognitive self-therapy	Nil	N/A	Y		Rethinker helps users cope with stressful or triggering situations. Users describe a situation and are given examples situations to explore their thoughts in that situation. These self-activities enable users to compare their evaluation of the event with what is reasonable, positive and negative thought process followed by self-evaluation.	4+	Medical	Y					Y		Y
S.T.A.R. Support	Stress, Trauma and Resiliency	Nil	N/A	Y		App that provides tailored mental health resources for individuals and organisations. The app supports teams of responders, medical professionals, addiction care specialists and individuals to decrease burnout, turnover and increase team well-being and productivity. Backed by research completed at Ohio State University, USA.	17+	Health & Fitness				Y	Y		Y	Y	Y	Y	Y
Self Help for Trauma	Self Tapping Step-by-step	3.7*	3	Y		Available in 33 languages, this app displays visuals to enable users to manage trauma symptoms through the application of Trauma Tapping Technique (TTT). TTT is an efficient and scalable non-verbal First Aid.	12+	Medical			Trauma Tapping Technique (TTT)		Y				Y
Self-Love	Self-care by CPT & Art Therapy	Nil	N/A	Y		This app is built on the content of self-parenting, a concept that has helped trauma survivors to establish healthy coping skills. The app asks users questions about flashbacks, triggers, and stresses in order to facilitate re-connection with their feelings, body and inner child. A combination of cognitive processing therapy and art therapy are applied in the exercises.	4+	Health & Fitness			Cognitive Processing Therapy (CPT) & Art Therapy		Y	Y			Y
Shadow's Edge	Art, Journaling, Shadow fights	Nil	N/A	Y		Shadow's Edge is the only mental health game (at time of data collection) where users defeat their personalised shadows in epic battles. Writing prompts are based on Narrative Therapy and Positive Psychology. Developed by The Digging Deep Project, an award-winning non-profit with a mission to create mental health tools that are based on expression, psychology and gaming.	12+	Casual			Narrative Therapy, Art Therapy & Positive Psychology			Y			Y			Y	Ad-free game with no in-app purchases.
Sleep Restore	Based on EMDR	4.4*	22	Y		Guided meditations + bilateral stimulation (BLS - based on EMDR). Audio sessions for getting to sleep and getting back to sleep; overcoming worry, tension and insomnia. Customisation of sessions available.	4+	Health & Fitness		Y			Y		Y		Y
Solfeggio Root Chakra 396Hz	Cleanse Guilt, Fear & Trauma	Nil	N/A	Y		This app plays low and smooth frequency that helps cleanse feelings of guilt, fear, and trauma associated with Muladhara (root) Chakra.	4+	Health & Fitness			Meditation						Y			Y
STAIR Coach	Help manage your emotions	Nil	N/A	Y		Self-help course based on Skills Training in Affective & Interpersonal Regulation (STAIR).	12+	Health & Fitness			Skills Training in Affective & Interpersonal Regulation (STAIR)		Y	Y		Y	Y		Y	Y
Stoic	How are you feeling?	4.8*	1.4k	Y		Everyday Stoic prepares bite-sized mental health exercises and fragments from books to help users deal with obstacles they face. It is a mental health tracker companion for mood tracking, journaling, meditations and reflection. The algorithm analyses users emotive influences and provides insights.	4+	Health & Fitness				Y		Y		Y	Y				Inspirational quotes and reminders are delivered to users.
Stress Less TRE	Medical	1*	1		14.99	Stress Less by TRE stands for tension & trauma Releasing Exercises to release stress/tension from the body accumulated from everyday difficult situations, immediate or prolonged situations or traumatic life eperiences.	12+	Medical			Tension & Trauma Releasing techniques		Y			Y	Y
Support Base	Support your treatment journey	Nil	N/A	Y		Support Base is a smartphone app designed to support frontline workers receiving clinical treatment for PTSD and other mental health conditions. The app includes core elements adapted from an evidenced-based, gold-standard PTSD treatment program by the UNSW Traumatic Stress Clinic. The app features are designed to be used in combination with structured therapy delivered in person or via telehealt…	17+	Health & Fitness			PTSD-informed strategies, Cognitive Restructuring & Explosure Therapy		Y			Y	Y		Y	Y
Tap For Joy	Tap into a stress-free life	Nil	N/A	Y		Tap For Joy is a resource for those who have PTSD. It uses an adaptaion of Eutaptics which rewires the brain and eases the pain from lingering trauma. The app guides you through meditations accompanid by acupressure tapping to reduce stress, anxiety, and increase calmness and happiness.	4+	Health & Fitness			Acupressure Tapping		Y	Y		Y	Y			Y
The Field Guide	because science is right	Nil	N/A	Y		The Field Guide is a psychosocial support and community mental health tool for those affected by stress and trauma with two main objectives: 1. To clarify why and how adverse experiences can affect the brain, body and social behavior, and 2. To provide specific information and exercises to confront the effects of stress, trauma and build resilience.	4+	Education				Y	Y				Y				Communicty based and requires an account.
The Pheonix Project	Let's Rise Together	Nil	N/A	Y		Phoenix is a caring digital community that supports mental health and wellness. The app includes modern tools and a collective care model to support users with their mental health progress.	12+	Health & Fitness				Y	Y					Y			Includes events and experiences that users have options to access.
The Place We Find Ourselves	Lifestyle	4.9*	8	Y		A podcast app that features private practice Adam Young and interview guests as they discuss all matters related to story, trauma, attachment, and interpersonal neurobiology. Each episode unpacks how trauma and abuse impacts the heart and mind, by giving users a glimpse of lived experiences of the guests.	17+	Lifestyle			Trauma informed & neurobiology		Y					Y			Settings include the 'share' function, reminders and contacts.
The Sleep Diary	Sleep Research & Clinical Tool	Nil	N/A	Y		This app is a sleep research and clinical tool that collects information about the user's sleep related symptoms and behaviors. Users can only access the app if they are enrolled in research studies.	4+	Medical				Y			Y				Y
Think: Mental Health Journal	Diary for anxiety/marriage/ocd	4.5*	2	Y		Think analyzes thoughts to help users undesrtand themselves and improve their lives. It uses artificial intelligence what you write and how you write and provides analysis instantly.	4+	Lifestyle				Y		Y		Y					Ad-free
Trauma Brace	Self help after trauma	Nil	N/A	Y		Brace was developed by a PTSD survivor and is ann app program to help users struggling after experiencing a trauma. Based on techniques that have been proven to reduce symptoms. Examples of traumatic experiences are combat, assault, terrorism, severe accident, loss of a loved one, abuse, life-threatening ilnness, healthcare maltreatment, natural disasters etc. Brace is marketed as a self-care app…	17+	Health & Fitness			PTSD-informed		Y	Y		Y	Y
Trauma Healing Yoga	Trauma Healing Yoga Therapy	Nil	N/A	Y		Designed to help sexually traumatised women to use yoga therapy (and other holistic, science-based techniques) to release and heal trauma.	17+	Health & Fitness			Trauma Healing Yoga Therapy		Y				Y	Y
Trauma Informed Care	Health & Fitness	Nil	N/A	Y		Designed to support caregivers and professionals in responding to trauma's impact on development and focuses. Includes Trauma Informed Care resources from a variety of sources.	17+	Health & Fitness			Trauma-informed Care		Y
Trauma Informed Prevention	TIPS	Nil	N/A	Y		Designed to be incorporated into trauma-focused therapy by clinicians with adolescent clients (13-18). The TIPS app focuses on prevention of risk behaviors that may arise following a traumtic event. App is intended for information, education and research purposes only.	17+	Health & Fitness			Trauma-focused therapy		Y				Y		Y
Trauma Logbook	Manage Intrusive Memories	Nil	N/A	Y		Research App assessing daily intrusive memories in individuals having experiences a traumatic event. Does not work unless you are an active study participant.	4+	Medical						Y					Y
Trauma Recovery	Health & Fitness	Nil	N/A	Y		Trauma Recovery Coach is for anyone who has recently experienced a traumatic event. This app provides training and tools to practice six skills that are helpful for trauma recovery. Developed by the Palo Alto Veterans Institute for Research.	4+	Health & Fitness				Y	Y				Y	Y	Y	Y
TraumaCall	Lifestyle	Nil	N/A	Y		TraumaCall is a subscription based app that puts its members in touch with nearby counsellors. It allows members to select counsellors based on expertise and proximity. The app functionality allows the counsellor to accept or decline member requests, and counsellors can navigate their way to the members based on the location from within the app.	12+	Lifestyle				Y							Y		Subscriptioin based app to connect members to counsellors.
TraumaMAMAs	Tools for Mamas after Trauma	Nil	N/A	Y		App provides tools and resources for mothers who have experienced trauma. Access to trauma-experts that answers questions, monthly toolkits, weekly resources, podcasts, and links to global hotlines/helplines.	4+	Education													App is free to download but requires a subscription fee to access all content.
Trigger Stop	Sensory and Emotional Check-In	Nil	N/A	Y		An app adults can use with and for children to express the sensations in their body with the emotions they are experiencing. The use of the app supports sensory and emotional identification and literacy which enables a child to have the ability to identify, understand and express sensations/feelings in a healthy way. the app allows users to customise a visual person by choosing colors and emotion…	4+	Education				Y		Y			Y
VetChange	Help with drinking and stress	Nil	N/A	Y		VetChange is an app designed for veterans, service members and anybody who is concerned about their drinking and how it relates to stress. This app can be useful for developing healthier drinking behaviors, gain insight into the correlation between drinking and moods/situations, use the app's interactive tools to manage stress and drinking, learn about alcohol usage and posttraumatic stress and t…	17+	Health & Fitness				Y	Y	Y		Y	Y	Y
We Love Trauma	A Game to Build connections	Nil	N/A		10.99	This app is a game designed around the body of research showing that vulnerability builds trust and fosters connections and those acts of connections including a safe space for users (that have been formed or caused by trauma) to interact. The goal of this game builds awareness of the ways different stressors and life events impact our mental health including how to communicate comfortably about …	12+	Health & Fitness				Y		Y			Y	Y		Y
Worrydolls	Tiny dolls to remove anxiety	4.8*	1.2k	Y		Worrydolls provides a small doll who is ready to listen to what is worrying users. Worrydolls is used like ajournal to help users overcome anxiety and stress. Developed based on mindfulness, cognitive behavioural therapy and magic.	4+	Health & Fitness			Mindfulness & Cognitive Behavioral Therapy (CBT)			Y		Y

## Sheet: Duplicates removed (n 210)
		App Name	Sub-heading descriptor	Rating	No. of ratings	Free	Paid (Amount in AUD)	Description
		#SelfCare	Let's stay in together	5*	395	Y
		365 Gratitude Journal	Daily Prompts for Self Care	4*	255	Y
		5 Minute Emergency Medicine	Med Consult Rose & Barkin's	5*	3	Y
		5 Minute Journal: Self-care	Daily Gratitude & Mood Tracker	5*	1.2k	Y
		5d Flash Vital	Health & Fitness	Nil	N/A	Y
		ABC-Trauma	Medical	Nil	N/A	Y
		Ace ATLS - Advance Trauma Life Support	Medical	1*	1		2.99
		ACE's	Adverse Childroom Experiences	Nil	N/A		7.99
		ACT Coach	Acceptance and commitment	3*	2	Y
		Acumed	Medical	Nil	N/A	Y
		Advanced Trauma Life Support Exam	ATLS Practice Test Questions	Nil	N/A		4.49
		AfterTrauma	Traumatic Injury Recovery Help	Nil	N/A	Y
		Anxiety Release based on EMDR	Health & Fitness	4.3*	30		7.99	Based on BLS which includes brain training, anxiety management sessions, pure bilateral stimulation and safe place exercise. Recommended for clinicians and clients.
		AO Surgery Reference	Medical	Nil	N/A	Y
		AO Trauma Orthogeriatrics	Medical	Nil	N/A	Y
		AO/OTA Fracture Classification	Medical	Nil	N/A	Y
		APN Connection	Virtual Therapy + Peer Support	Nil	N/A	Y
		ATN Creating TSS Conference	Productivity	Nil	N/A	Y
		Awaken Me - Emotions	Deal with your trauma.	Nil	N/A	Y
		Awesome Ultrasound Simulation	POCUS Simulation	5*	9		22.99
		BEHCA	See Beyong Behavior	Nil	N/A	Y
		Bloom Coaching	Healing from betrayal trauma	Nil	N/A	Y
		Bounce Back Now	Health & Fitness	Nil	N/A	Y
		Bright Path	Education	Nil	N/A	Y
		BSDR Player	Health & Fitness	5*	1		7.99
		Bullet Diary & Journal: Diarly	Reflect & organize your life	4*	26	Y
		Calm and Confident	Relax and reconnect	5*	10		7.99	Comprises 10 guided meditations based on trauma therapy principles. EMDR.
		Case Files Critical Care, 2 ed.	Sharpen your critical thinking	Nil	N/A	Y
		CBT Thought Diary	Mood Tracker & Therapy Journal	5*	636	Y
		Complete Home and Outdoor First Aid Course	Medical	Nil	N/A	Y
		Concussion Smart	Education	Nil	N/A	Y
		Couple HOPES	Lifestyle	Nil	N/A	Y
		CPT Coach	Cognitive Processing Therapy	Nil	N/A	Y
		Curable	Chronic Pain Relief	5*	99	Y		Free chat with virtual coach to design a customised program tailored to users symptoms and preferences.
		Daily Bean - Simplest Journal	The simplest way to record day	5*	2.1k	Y
		DAILY NOTE - Day Note, Diary	Lifestyle	4.5*	17	Y
		Day One Journal: Private Diary	Notes, photos, voice recording	5*	5.3k	Y
		Daylio Journal	Self-care Bullet Diary & Goals	5*	3.5k	Y
		DAYOL	Decorate My Diary	5*	2	Y
		DayOne: Productivity	We make employees great	Nil	N/A	Y
		DayStamp - Habit Tracker	Goals Planner & To Do List	5*	9	Y
		Dental Info	Medical	Nil	N/A	Y
		Deployed Medicine	Medical	5*	1	Y
		Dialogue Network	Moral injury social network	Nil	N/A	Y
		Diary - Private Note with Lock	Journal, Diary, Moods	5*	8	Y
		Diary with password	No Ads Journal Diary Notebook	4.5*	1.7k	Y
		Doing Doing	Digital Diary	5*	6	Y
		Dynamic Virtual Recovery	Digital Addiction Recovery	Nil	N/A	Y		Online community. Access live group therapy, virtual therapy with licensed therapists, design and promote events, share and exchange experiences and resources.
		Eagles Haven Wellness Centre	Health & Fitness	Nil	N/A	Y		App for Eagles' Haven wellness center clients to plan and schedule classess and services.
		Elderly Mortality After Trauma	Medical	Nil	N/A	Y
		EMDR	Look. Listen. Feel	Nil	N/A	Y
		EMDR 101	follow the dot…	5*	3		7.99
		Emergency Medicine Case Files	Ace USMLE - 59 real-life cases	Nil	N/A	Y
		EMMO - Life Record	Draw your mood face!	5*	1.2k	Y
		Employee Assistance Services	Books	Nil	N/A	Y		EASA EAP provides crisis contact numbers, resources for managers and employees.
		EMS ALS Guide	Medical	5*	1		9.99
		EMS Notes: EMT & Paramedic	Covers 100+ Emergency Drugs	Nil	N/A	Y
		Endolit	Education	5*	4	Y
		EyeMoveX.a - EMDr Sessions	Reduce your bad memories	5*	4	Y
		EyeMoveX.as - EMDR Sessions	Reduce your bad memories	3*	1		4.49
		F.I.R.S.T Support	Stress & trauma Response	Nil	N/A	Y
		Finch: Self Care Widget Pet	Daily Journal & Habit Tracker	5*	1.5k	Y
		First - First Responder Health	Protect Against Trauma	Nil	N/A	Y
		FML - FMyLife	Daily dose of trauma dumping	Nil	N/A	Y
		Glasgow Coma Scale - SOG	Medical	Nil	N/A	Y
		GO EFT TAPPING - Reduce Stress	Instant stress reduction	5*	12	Y
		Habit Tracker	Build Habits, Track Goals	5*	2.7k	Y
		HeadSmart	Sports Concussion Assessment	Nil	N/A	Y
		HELIMED: play life saving missions	Education	Nil	N/A	Y
		Home First Aid: Commercial Version	Health & Fitness	Nil	N/A	Y
		HOT TOPICS TRAUMA 2022	Medical	Nil	N/A	Y
		I am - Daily Affirmations	Manifest motivation reminders	5*	15k	Y
		I am Sober	A better you one day at a time	5*	6.4k	Y
		iChill	Guided wellness skills	5*	1	Y
		iCU Notes	Medical	5*	4	Y
		Insomnia Coach	Help improve your sleep.	Nil	N/A	Y
		KidTrauma	Medical	Nil	N/A	Y
		KY Trauma	Symposium	Nil	N/A	Y
		Loving The Self Affirmations	Self Love and Heal Trauma	5*	4	Y
		Man Down UK	Health & Fitness	Nil	N/A	Y
		MedTRiM	Medical	Nil	N/A	Y		Medical Trauma and Resillience Management
		Meomind - Free Therapy	Personalised, recorded therapy	Nil	N/A	Y
		Meomind - Y Therapy	Personalised, Recorded Therapy	Nil	N/A	Y
		MiLTRiM	Health & Fitness	Nil	N/A	Y		Trauma Risk Management - Military Edition
		MindFit.ai	Fir your mind, value yourself	Nil	N/A	Y
		MindFit.ai	Fir your mind, value yourself	Nil	N/A	Y
		Mininote - Mood diary and note	Draw yoyr own emotions	5*	78	Y
		Mira Trauma and PTSD Support	Symptom Management and Support	2*	1	Y
		Mira Trauma and PTSD Support	Symptom Management and Support	2*	1	Y		Self-help app to manage trauma symptoms and PTSD. Includes Exercises, trigger, symptom tracking, analytics to record user progress, emergency hotlines, resources and more.
		Mission Reconnect	For Veterans and Partners	Nil	N/A	Y
		Mission Trauma.	Medical	Nil	N/A	Y
		Mita Trauma and PTSD Support	Symptom Management and Support	2*	1	Y
		Mobi-MD	Health & Fitness	Nil	N/A	Y
		Mood Coach Explorer	Health & Fitness	Nil	N/A	Y
		MOODA	Time to face myself	5*	34		1.49
		Mooditude: Self-care App	Track & improve your mood	5*	5	Y
		Moodnotes - Mood Tracker	Self-care & CBT Journal	4.5*	616	Y
		Moon Balance - Mental Health	Self-care & relaxing Games	4*	1.2k	Y
		My Diary - Journal with lock	Bullet Journal Diary with lock	5*	390	Y
		myAO	Clinical case sharing and more	4*	3	Y
		MyATLS	Medical	4*	24	Y
		MyREBOOT	REBOOT Recovery	Nil	N/A	Y		Online community for people impacted by trauma and mental health challenges. Access to online courses related to trauma healing, lifeguides, podcasts and blogs.
		Nevermind - Heart Rate Companion	Adventure	Nil	N/A	Y
		Notebook - Diary, Journal	Productivity	4.5*	73	Y
		NSW Trauma	Medical	3.5*	4	Y
		Nurse Test Lite	Medical	Nil	N/A	Y
		obimy	Lifestyle	4*	336	Y
		Ortho Traumapedia	Medical	3*	9		14.99
		OrthoFlow	Medical	5*	20		7.99
		Orthopaedics Physical Therapy	34 Clinical PT Case Files	Nil	N/A	Y
		Orthopedic Trauma	Medical	Nil	N/A		5.99
		Orthopedic Trauma Association	Reference	Nil	N/A	Y
		Overcome pain based on EMDR	Based on EMDR	3.9*	7		9.99	Comprises of 3 playlists for controlling pain and associated stress that maintain pain. EMDR.
		P247	Psychcare App	Nil	N/A	Y
		Paramedic Pocket Prep	National Registry Exam Prep	5*	3	Y
		Paramedic Trauma Review	Medical	Nil	N/A		9.99
		PE Coach 2	Health & Fitness	Nil	N/A	Y
		PFA Mobile	Health & Fitness	Nil	N/A	Y
		Physical Therapy Case Files	Dozens of realistic PT cases	Nil	N/A	Y
		Picka: 30 Days to Love	Virtual Simulation Messenger	4.5*	112	Y
		Pocket ICU	Best-selling Critical Care App	3*	2	Y
		PolTRiM	Health & Fitness	Nil	N/A	Y		Police Trauma and Resillience Management
		PSAC STARS & SPURS	Official event application	Nil	N/A	Y
		Psychological First Aid (PFA)	Health & Fitness	Nil	N/A	Y
		PTSD Coach	Health & Fitness	4.5*	21	Y
		PTSD Coach Australia	Health & Fitness	4*	6	Y
		PTSD Coach Canada	Health & Fitness	Nil	N/A	Y
		PTSD Family Coach	Health & Fitness	Nil	N/A	Y
		PTSD Free	3 Keys to Live PTSD Free	Nil	N/A	Y
		PTSD Test	Post-traumatic Stress Disorder	5*	20	Y
		PTSD Test (PCL)	Post-traumatic Stress Disorder	Nil	N/A	Y
		PTSD Toolkit for Nurses	Health & Fitness	Nil	N/A	Y
		R U Suicidal?	Health & Fitness	3*	2	Y
		RailRes	Health & Fitness	5*	4	Y
		Real World Radiology	Medical	1*	1		4.49
		Real World Orthopedics	Medical	5*	1		14.99
		Reflectly - Journal & AI Diary	Mood Tracker & Daily Quotes	4*	6k	Y
		Reframe: Drink Less & Thrive	Cut Back/Quit Drinking Alchohol	5*	926	Y
		ReMind Training Management	Trauma Training Management App	Nil	N/A	Y		For medical providers offering a one-stop shop for bookings and renewals of courses.
		Rethinker	Cognitive self-therapy	Nil	N/A	Y
		Routinery: Ritual/Routine	Make routine & self care	5*	243	Y
		RPA Trauma	Medical	5*	1	Y
		S.T.A.R. Support	Stress, Trauma and Resiliency	Nil	N/A	Y
		Saged: Spiritual Journey	Daily Rituals, Magic & Classes	5*	58	Y
		SaskTrauma	Reference	Nil	N/A	Y
		Self Helf for Trauma	Self Tapping Step-by-step	4*	3	Y
		Self-Love	Self-care by CPT & Art Therapy	Nil	N/A	Y
		Shadow's Edge	Art, Journaling, Shadow fights	Nil	N/A	Y
		Ship Captain's Medical Guide	Critical Medical References	4.5*	4		4.49
		SHOO IN On Demand	Wellness video platform	Nil	N/A	Y		400+ videos of holistic, instructive and preventative programs for health and wellness.
		Simple Diary: keep notes daily	Journal your day and mood	4.5*	197	Y
		Sisu	Lifestyle	Nil	N/A	Y
		Ski & Mountain Trauma Conf.	Business	Nil	N/A	Y
		Sleep Restore	Based on EMDR	4.4*	22	Y		Guided meditations + bilateral stimulation (BLS - based on EMDR). Audio sessions for getting to sleep and getting back to sleep; overcoming worry, tension and insomnia. Customisation of sessions available.
		SLIC	Medical	1*	3	Y
		Solfeggio Root Chakra 396Hz	Cleanse Guilt, Fear & Trauma	Nil	N/A	Y
		SonoAccess	Mobile Ultrasound Education	3*	4	Y
		STAIR Coach	Help manage your emotions	Nil	N/A	Y		Self-help course based on Skills Training in Affective & Interpersonal Regulation (STAIR).
		stoic	How are you feeling?	5*	1.4k	Y
		Stress Less TRE	Medical	1*	1		14.99
		Structured - Day Planner	Visual Calendar & Reminders	5*	3.5k	Y
		Support Base	Support your treatment journey	Nil	N/A	Y
		SVS iPG	Medical	Nil	N/A	Y
		Tap For Joy	Tap into a stress-free life	Nil	N/A	Y
		TBI Prognosis	Medical	Nil	N/A	Y
		TCRN Trauma Nurse Exam Prep	Emergency Nursing Study Guide	Nil	N/A	Y
		The Field Guide	because science is right	Nil	N/A	Y
		The Phenix Project	Let's Rise Together	Nil	N/A	Y
		The Place We Find Ourselves	Lifestyle	5*	8	Y
		The ReSource	Clinical practice guidelines	Nil	N/A	Y
		The Sleep Diary	Sleep Research & Clinical Tool	Nil	N/A	Y
		Think: Mental Health Journal	Diary for anxiety/marriage/ocd	5*	2	Y
		Trauma Association of Canada	Education	Nil	N/A	Y
		Trauma Brace	Self help after trauma	Nil	N/A	Y
		Trauma Care	Medical	Nil	N/A	Y
		Trauma Clean	Forensic cleaners	Nil	N/A	Y
		Trauma Guide	Education	Nil	N/A	Y
		Trauma Guidelines	Medical	Nil	N/A	Y
		Trauma Healing Yoga	Trauma Healing Yoga Therapy	Nil	N/A	Y
		Trauma Informed Care	Health & Fitness	Nil	N/A	Y
		Trauma Informed Prevention	TIPS	Nil	N/A	Y
		Trauma Life Support - ATLS	Trauma Certification Questions	Nil	N/A	Y
		Trauma Life Support (ATLS)	Board Review Questions	Nil	N/A	Y
		Trauma Logbook	Manage Intrusive Memories	Nil	N/A	Y		Research App assessing daily intrusive memories in individuals having experiences a traumatic event. Does not work unless you are an active study participant.
		Trauma Nursing	Review Questions & Answers	Nil	N/A	Y
		Trauma Recovery	Health & Fitness	Nil	N/A	Y
		Trauma Recovery Services	Medical	Nil	N/A	Y
		Trauma Scoring	Medical	Nil	N/A	Y
		Trauma Services	Lifestyle	Nil	N/A	Y
		Trauma Victoria	Medical	5*	4	Y
		Trauma.nl (NVT)	Medical	Nil	N/A	Y
		TraumaCall	Lifestyle	Nil	N/A	Y
		TraumaMAMAs	Tolls for Mamas after Trauma	Nil	N/A	Y
		TraumaSoft GPS	GPS tracking appo	Nil	N/A	Y
		TraumaUtrecht	Medical	Nil	N/A	Y
		Triangle Trauma	A Game About Triangles	Nil	N/A	Y
		Trigger Stop	Sensory and Emotional Check-In	Nil	N/A	Y
		TRISS Calculator	Trauma Injury Severity Score	Nil	N/A	Y
		U of Trauma Protocols	Medical	Nil	N/A	Y
		Valhalla Cell Therapy	Health & Fitness	Nil	N/A	Y
		VetChange	Help with drinking and stress	Nil	N/A	Y
		Veterans Task Manager	Health & Fitness	Nil	N/A	Y		Created for veterans who have suffered head injuries but can be helpful for anyone who has trouble focusing and completing goals.
		Vibely: Challenge & Chats	Hype each other the f up	4.5*	38	Y
		We Love Trauma	A Game to Build connections	Nil	N/A		10.99
		Westmean Trauma Algoritm	Medical	5*	1	Y
		What's Wrong Wellness	Business	Nil	N/A	Y
		Woblink	Books	1*	1	Y
		Worrydolls	Tiny dolls to remove anxiety	5*	1.2k	Y
		Zinnia Journal & Planner	Your Creative Diary & Planner	4.5*	1.1k	Y
		ZS Maxillofacial Trauma Score	Medical	Nil	N/A	Y

## Sheet: Methods
	Methods:	Search Terms:
	Apps were collected by search key terms related to trauma- and stressor disorders	Trauma
	Collected on 4 June 2022	Traumatic Stress
	App store for Iphone/ios	Trauma Mental Health
	English	Trauma Management
		Trauma Recovery
		Moral Injury
	Search strategy and selection procedure
	The main author and researcher searched the AppStore applying trauma-related search terms ('trauma', 'trauma mental health', 'traumatic stress', 'trauma management', 'trauma recovery' and 'moral injury'). App data were collected on 4th June 2022. The identified apps were screened and anlaysed if the title or description indicated that the app was 1. conceptualised for mental disorders focused on …

[truncated: 6 more sheets: Trauma, Trauma Mental Health, Traumatic Stress, Trauma Management, Trauma Recovery, Moral Injury]
